# Supplementary material for: Long-read and chromosome-scale assembly of the hexaploid wheat genome achieves high resolution for research and breeding
Source: bioRxiv or medRxiv preprint supplement (doi:10.1101/2021.08.24.457458), 2022-02-03

**Table S1: Statistics of the ONT sequencing data**

|                  | Raw ONT reads            | Longest reads |
|------------------|--------------------------|---------------|
| Number of runs   | 2 MinION + 18 PromethION |               |
| Cumulative size  | 1,074 Gb                 | 510 Gb        |
| # of reads       | 120,883,721              | 11,654,667    |
| Coverage (17Gb)  | 63 X                     | 30 X          |
| N50 (bp)         | 24,651                   | 45,077        |
| Coverage (>50Kb) | 14.1 X                   | 14.1 X        |

**Table S2: BNG Optical map**

|                               | DLE-1 genome map |
|-------------------------------|------------------|
| Genome map number             | 1,053            |
| Total Genome Map Length (Mbp) | 14,947           |
| Genome Map N50 (Mbp)          | 37.5             |

**Table S3: Raw long-read assemblies**

|                      | SMARTDeNovo                    | Redbean                   | Flye                      |
|----------------------|--------------------------------|---------------------------|---------------------------|
| Subset of reads used | Longest - 30X                  | Longest - 30X             | Longest - 30X             |
| Cumulative size      | <b>14,155,561,280</b>          | 29,695,324,870            | 13,050,586,822            |
| # contigs            | 21,197                         | 646,779                   | <b>14,205</b>             |
| longest contig (bp)  | 13,367,134                     | 957,564                   | <b>18,693,219</b>         |
| minimal size (bp)    | 34,696                         | 1,157                     | 50,033                    |
| N50 (L50)            | 1,142,720 (3,758)              | 76,231 (107,967)          | <b>1,775,593 (2,165)</b>  |
| N90 (L90)            | 322,974 (12,488)               | 21,181 (397,125)          | <b>471,502 (7,566)</b>    |
| Restitution time (h) | 408                            | 168                       | 1,032                     |
| IT                   | 8 nodes with 32-core and 1.5Tb | 1 node of 64-core and 3Tb | 1 node of 64-core and 3Tb |

**Table S4: Hybrid assemblies obtained using ONT and BNG data**

|           |                       | SMARTDeNovo                                                                                               | Flye                                                                                 |
|-----------|-----------------------|-----------------------------------------------------------------------------------------------------------|--------------------------------------------------------------------------------------|
| Scaffolds | Cumulative size       | <b>14,272,571,061</b>                                                                                     | 14,204,637,528                                                                       |
|           | # scaffolds           | 4,255                                                                                                     | <b>4,135</b>                                                                         |
|           | longest scaffold (bp) | <b>253,607,211</b>                                                                                        | 252,437,931                                                                          |
|           | N50 (L50)             | 48,460,876 (79)                                                                                           | <b>49,688,204 (77)</b>                                                               |
|           | N90 (L90)             | 7,877,958 (378)                                                                                           | <b>8,121,250 (362)</b>                                                               |
|           | % of unknown bases    | <b>1.81%</b>                                                                                              | 5.99%                                                                                |
| Contigs   | Cumulative size       | <b>14,014,403,266</b>                                                                                     | 13,330,835,323                                                                       |
|           | # contigs             | <b>14,241</b>                                                                                             | 15,282                                                                               |
|           | longest contig (bp)   | 15,116,800                                                                                                | <b>19,215,531</b>                                                                    |
|           | N50 (L50)             | <b>2,144,699 (1,963)</b>                                                                                  | 1,662,574 (2,131)                                                                    |
|           | N90 (L90)             | <b>595,732 (6,672)</b>                                                                                    | 440,639 (8,204)                                                                      |
|           | BUSCO<br>(n=4,896)    | <b>Complete : 97.0%</b><br><b>Duplicated : 87.3%</b><br><b>Fragmented : 0.4%</b><br><b>Missing : 2.6%</b> | Complete : 96.7%<br>Duplicated : 86.6%<br><b>Fragmented : 0.4%</b><br>Missing : 2.9% |

**Table S5: Impact of the polishing**

|                     |                      | SMARTDeNovo<br>raw | SMARTDeNovo<br>polished with<br>long reads | SMARTDeNovo<br>polished with<br>short reads |
|---------------------|----------------------|--------------------|--------------------------------------------|---------------------------------------------|
| BUSCO<br>(n=4,896)  | Complete             | 83.0%              | 96.7%                                      | 96.6%                                       |
|                     | Duplicated           | 32.5%              | 83.1%                                      | 87.0%                                       |
|                     | Fragmented           | 2.4%               | 0.6%                                       | 0.6%                                        |
|                     | Missing              | 14.6%              | 2.7%                                       | 2.8%                                        |
| IBSPs<br>(n=5.76 M) | Aligned              | 80.4%              | 92.9%                                      | 93.4%                                       |
|                     | Perfectly<br>aligned | 7.0%               | 28.0%                                      | 58.9%                                       |

**Table S6: Statistics of the ONT reads obtained with two different versions of the guppy basecaller**

|                  | Guppy 3.3                                                        | Guppy 3.6  |
|------------------|------------------------------------------------------------------|------------|
| Number of runs   | 2 MinION + 18 PromethION<br>Selection of the longest reads (30X) |            |
| Cumulative size  | 510 Gb                                                           | 510 Gb     |
| # of reads       | 11,731,678                                                       | 11,654,667 |
| Coverage (17Gb)  | 30 X                                                             | 30 X       |
| N50 (bp)         | 44,797                                                           | 45,077     |
| Coverage (>50Kb) | 13.9 X                                                           | 14.1 X     |

**Table S7: Long-read assemblies with ONT reads obtained with two different versions of the guppy basecaller**

|                      | SMARTDeNovo                | SMARTDeNovo                |
|----------------------|----------------------------|----------------------------|
| Subset of reads used | Guppy 3.3<br>Longest - 30X | Guppy 3.6<br>Longest - 30X |
| Cumulative size      | 13,975,909,499             | <b>14,155,561,280</b>      |
| # contigs            | 26,167                     | <b>21,197</b>              |
| longest contig (bp)  | 6,593,358                  | <b>13,367,134</b>          |
| minimal size (bp)    | 33,360                     | <b>34,696</b>              |
| N50 (L50)            | 899,898 (4,685)            | <b>1,142,720 (3,758)</b>   |
| N90 (L90)            | 247,425 (15,801)           | <b>322,974 (12,488)</b>    |

**Figure S1.** Coverage of individual chromosomes with Illumina short-reads. Coverage was computed using 100 kb windows.

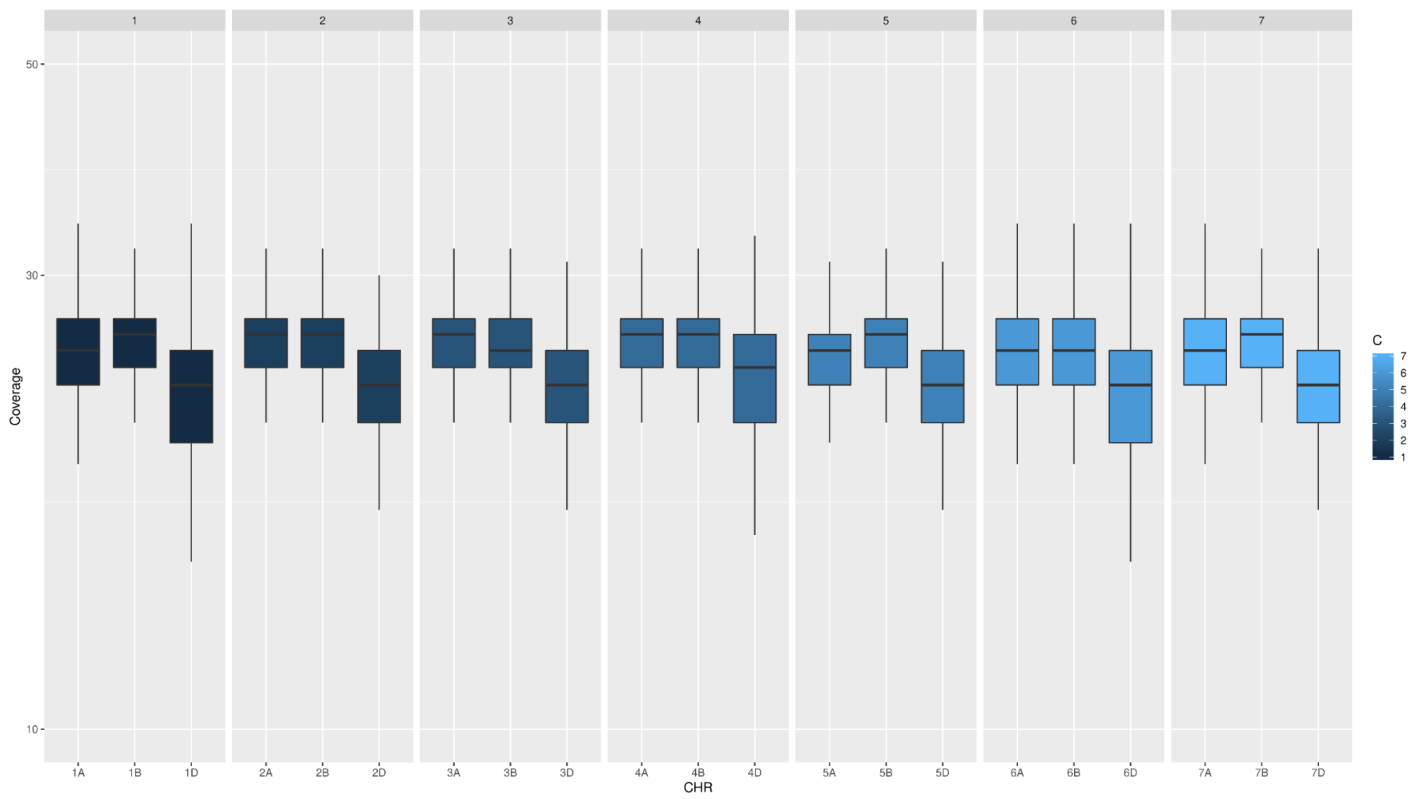

**Figure S2.** Coverage of individual chromosomes with ONT long-reads. Coverage was computed using 100 kb windows.

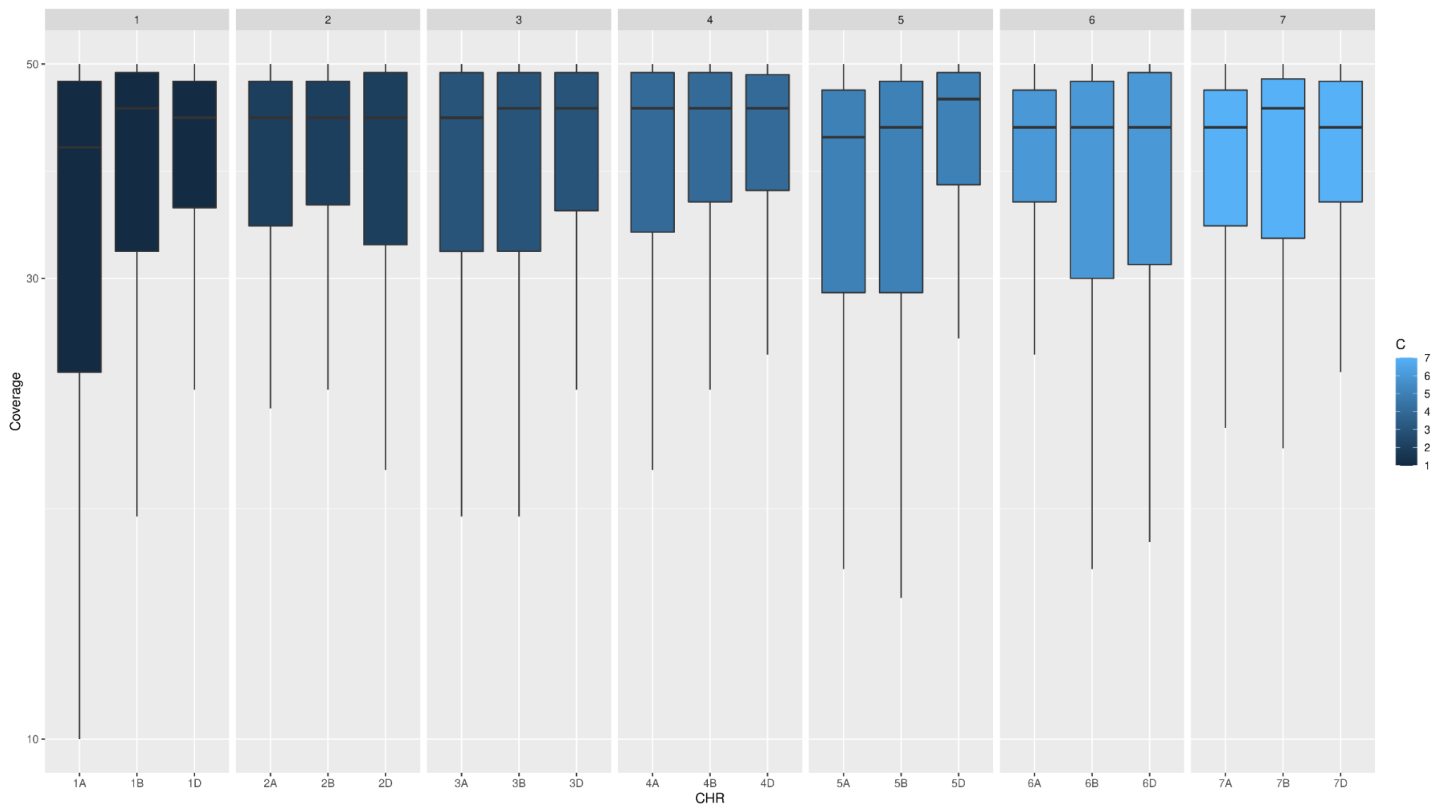



**Figure S3.** Number of gaps per Mbp in Chinese Spring and Renan genome assemblies.

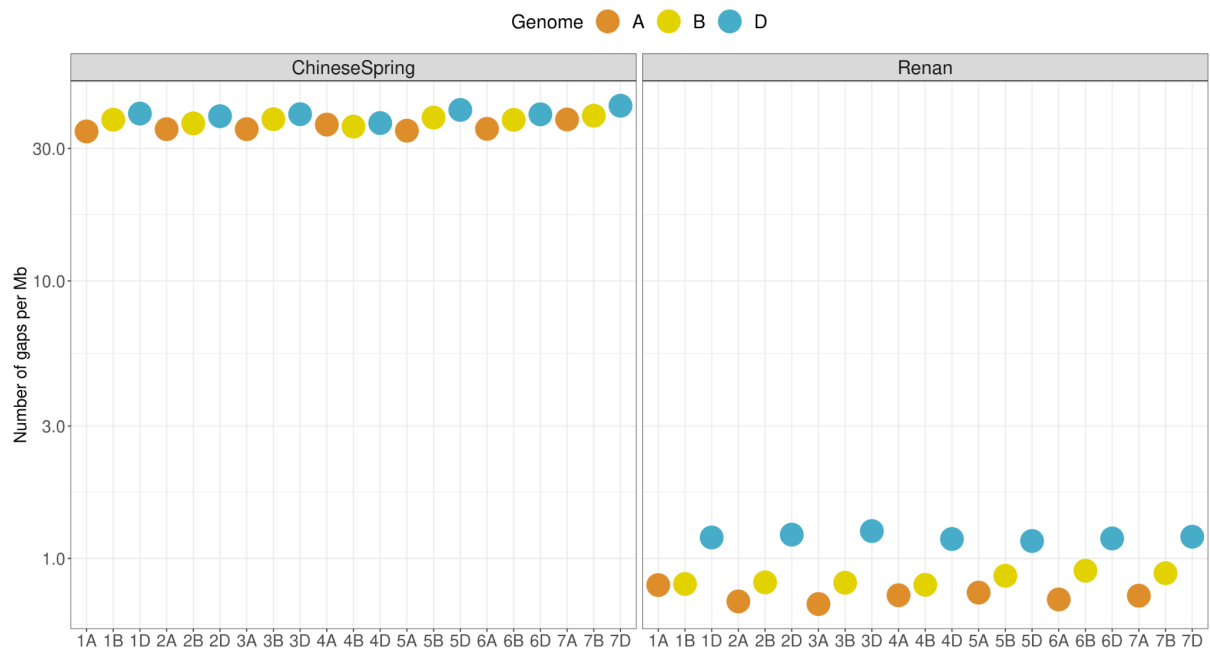

Supplement: Supplementary file [file media-1.pdf]
