# Supplementary material for: Long-read and chromosome-scale assembly of the hexaploid wheat genome achieves high resolution for research and breeding
Source: bioRxiv or medRxiv preprint supplement (doi:10.1101/2021.08.24.457458), 2022-02-03
Supplement: Supplementary file [file media-2.pdf]

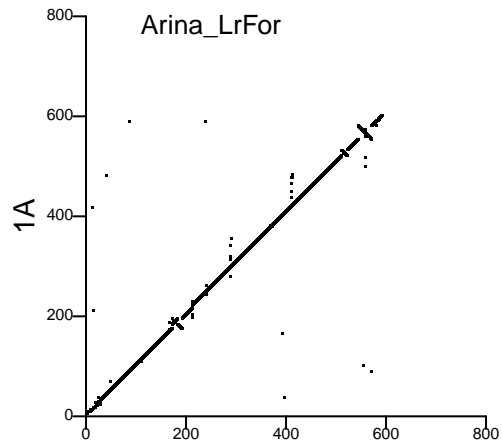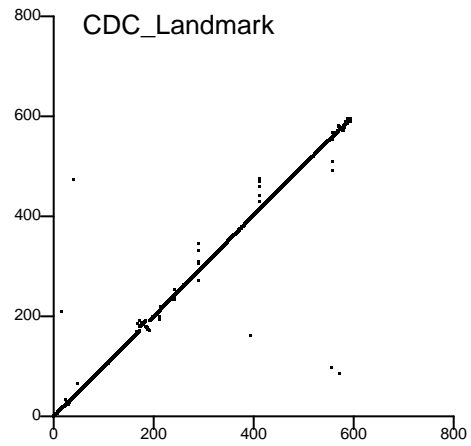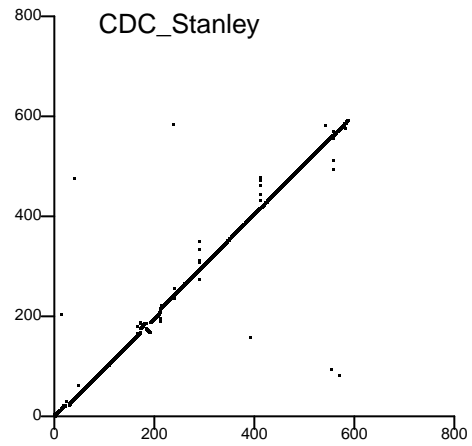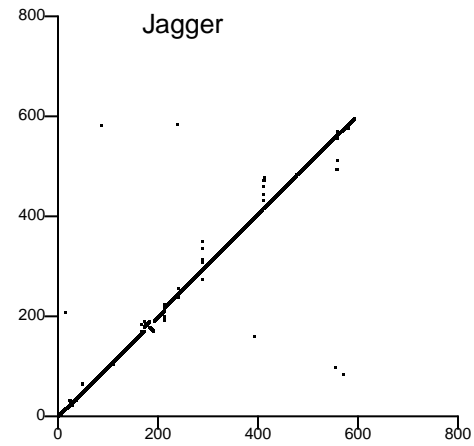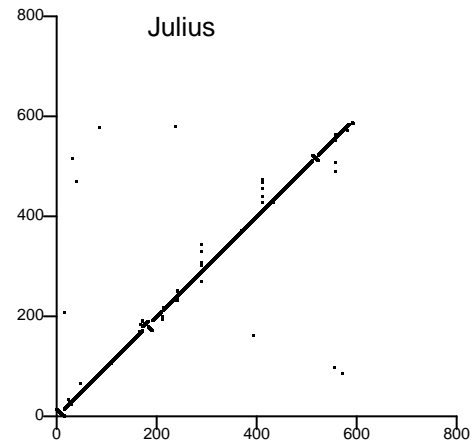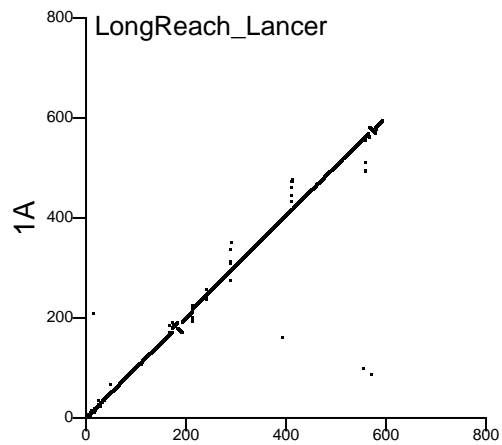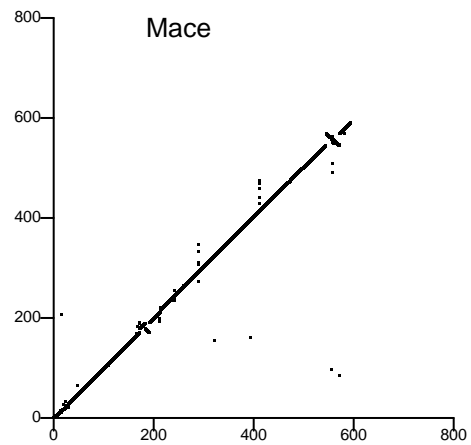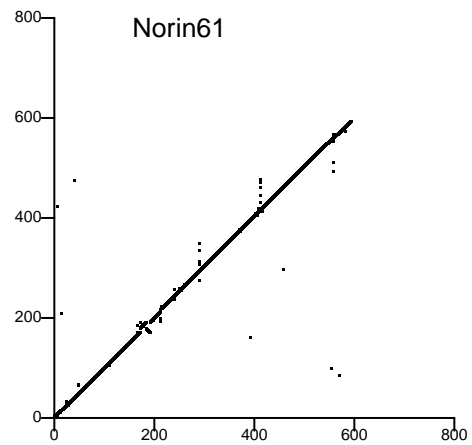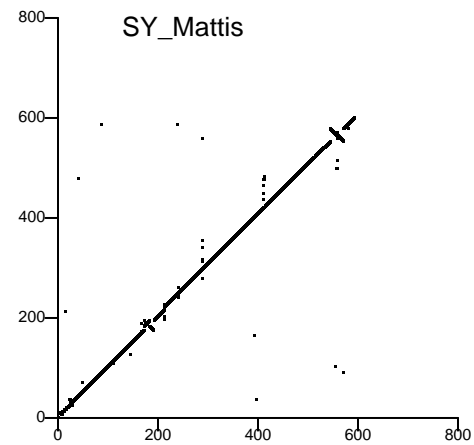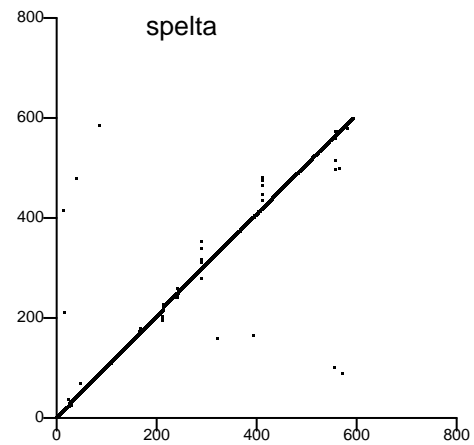

Renan chromosome 1A (Mb)

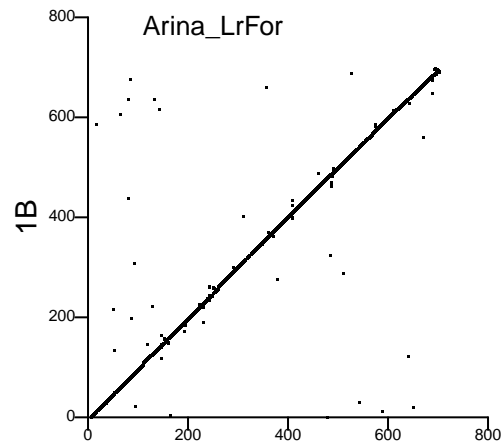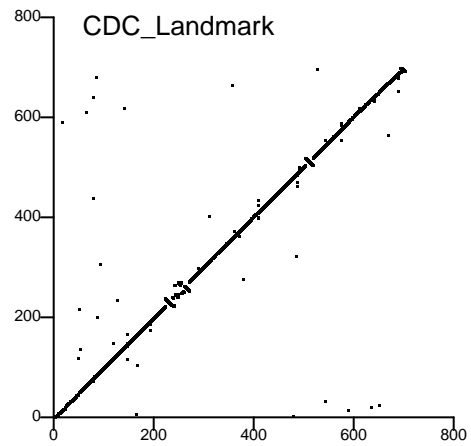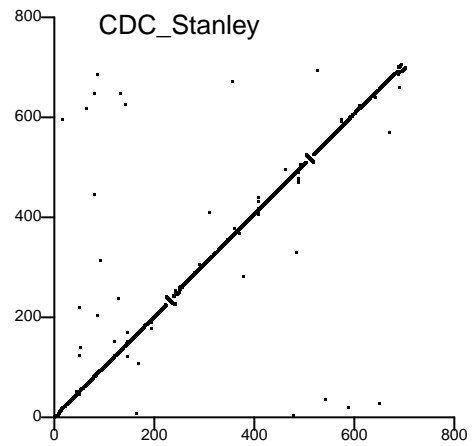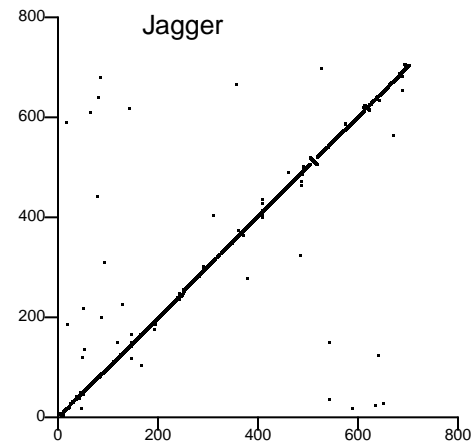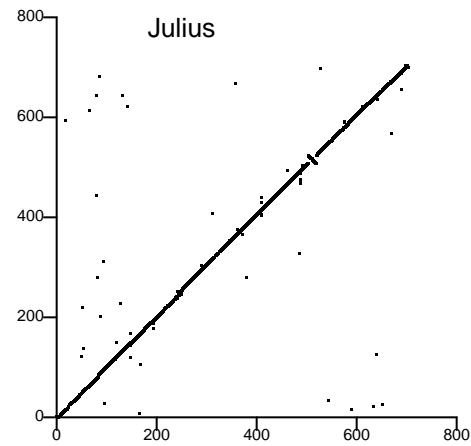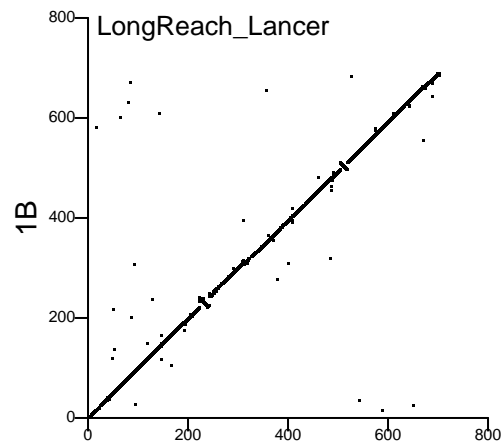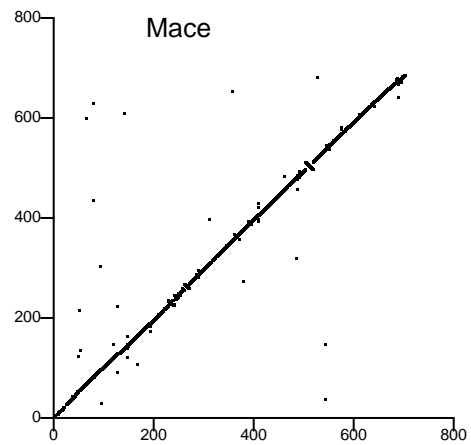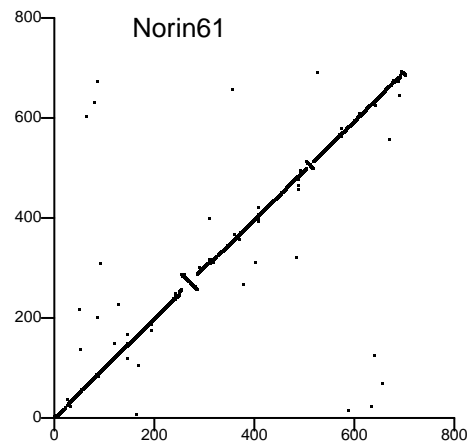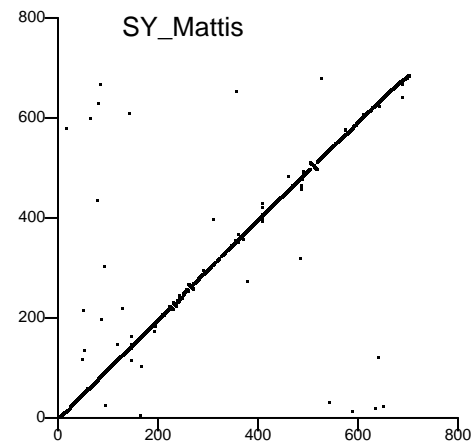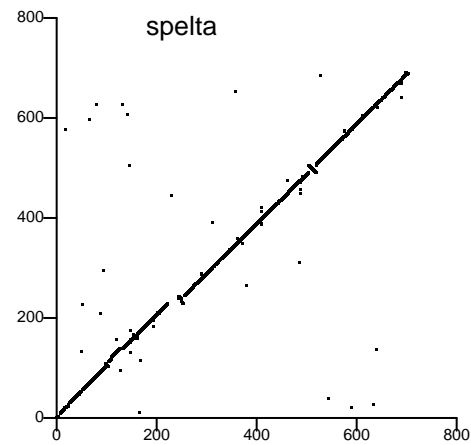

Renan chromosome 1B (Mb)

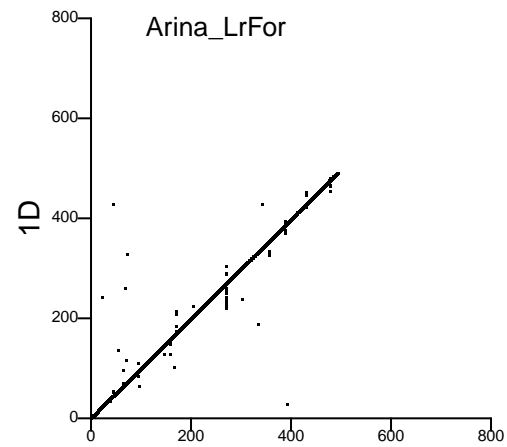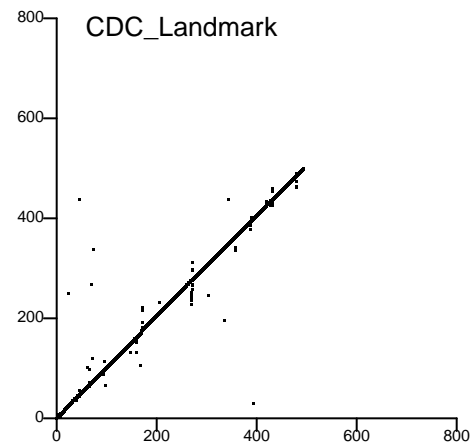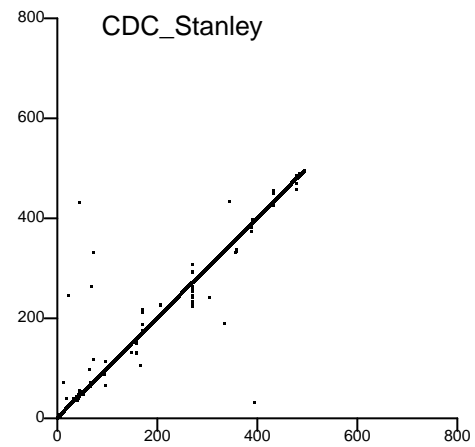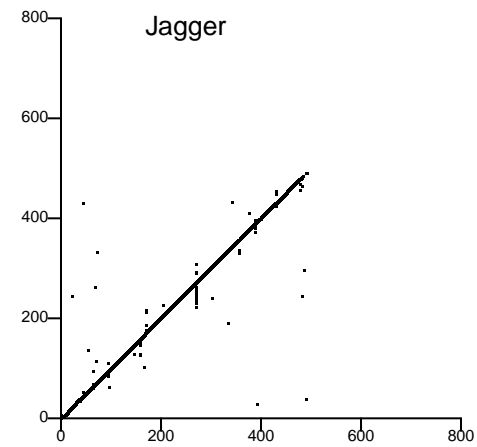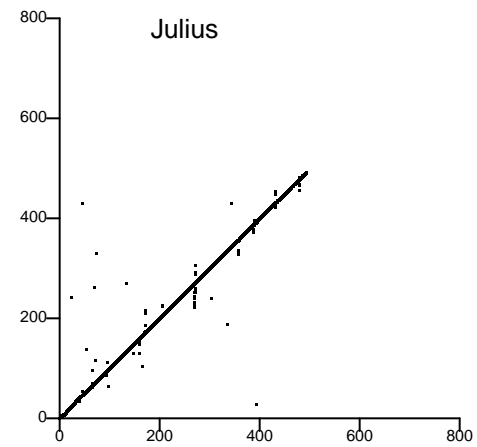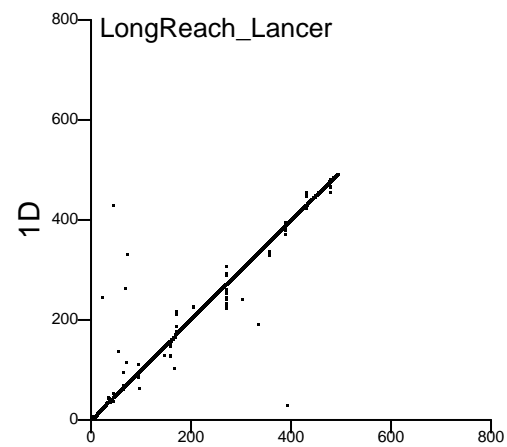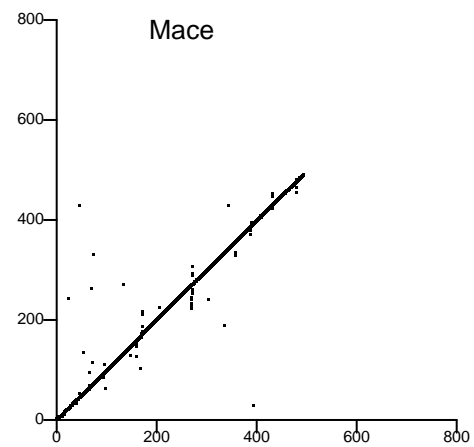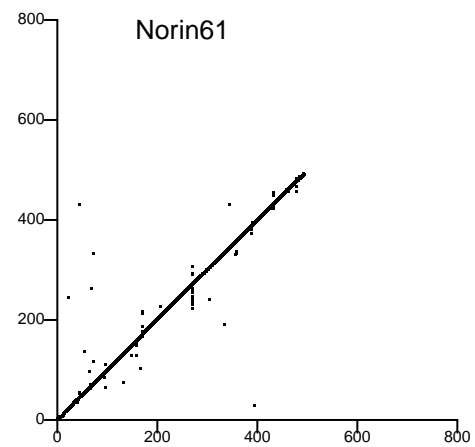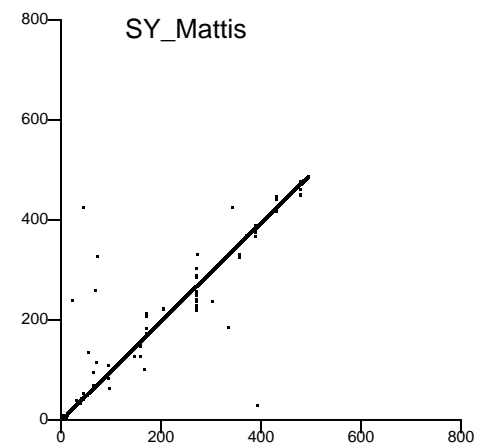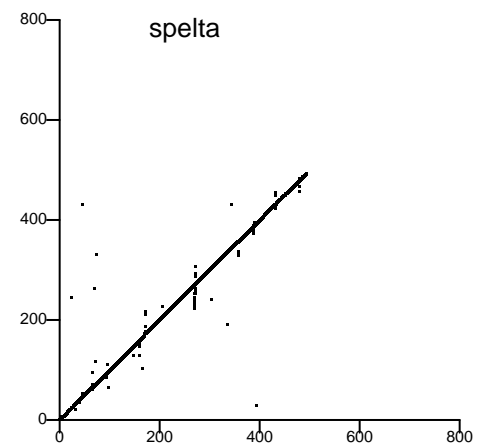

Renan chromosome 1D (Mb)

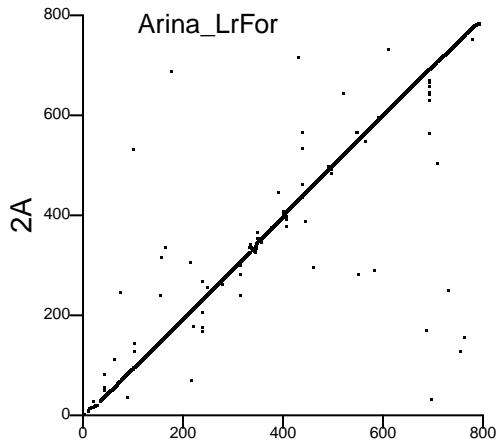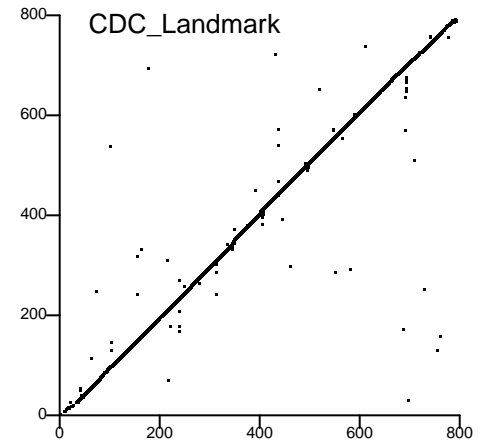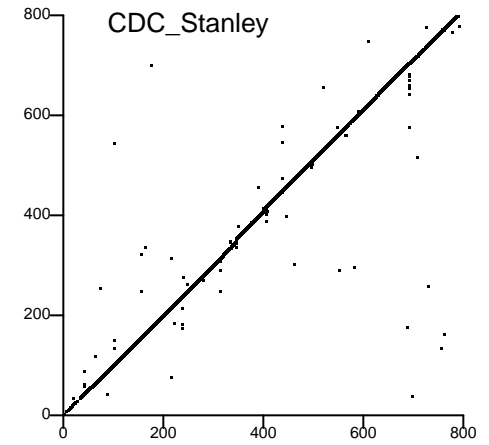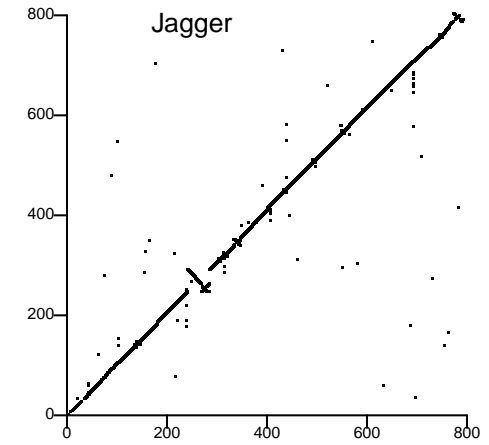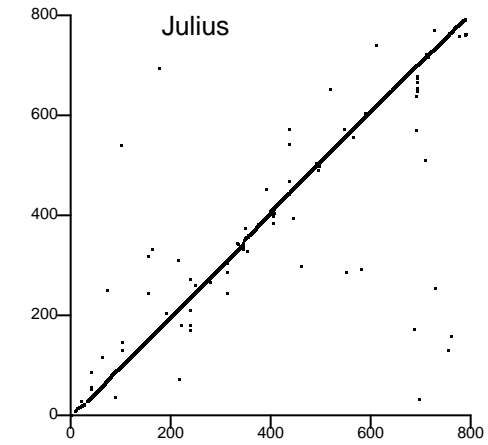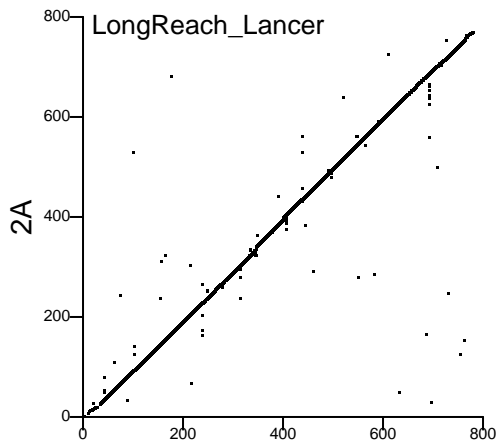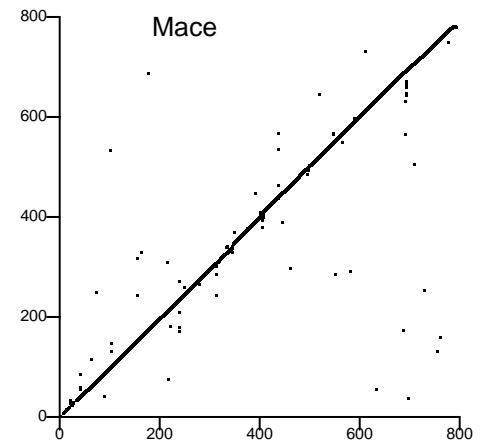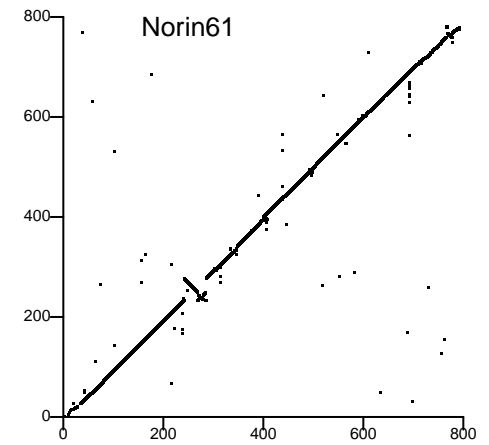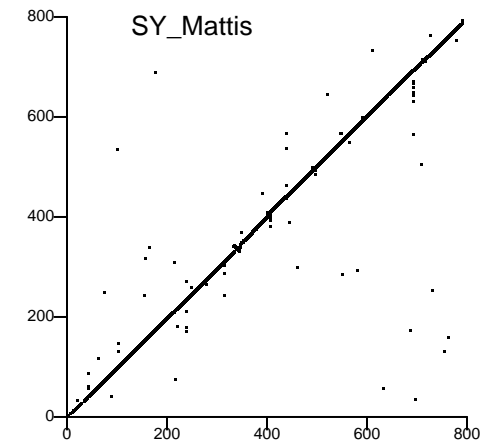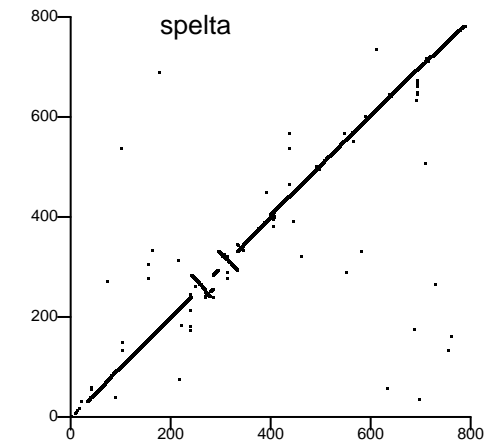

Renan chromosome 2A (Mb)



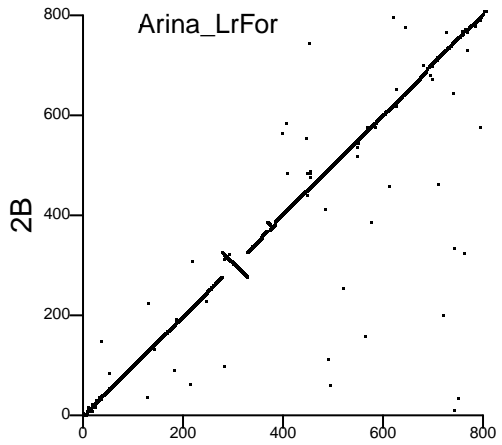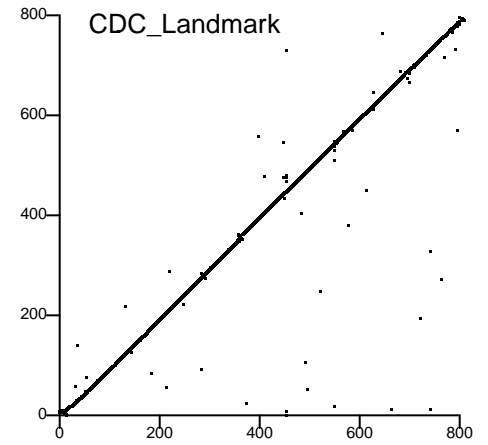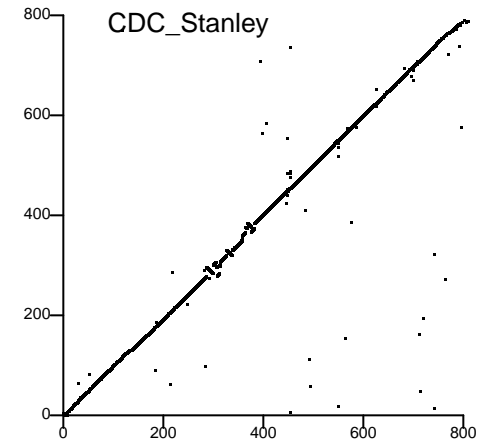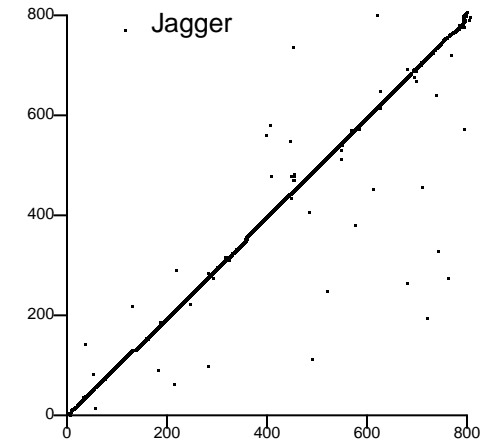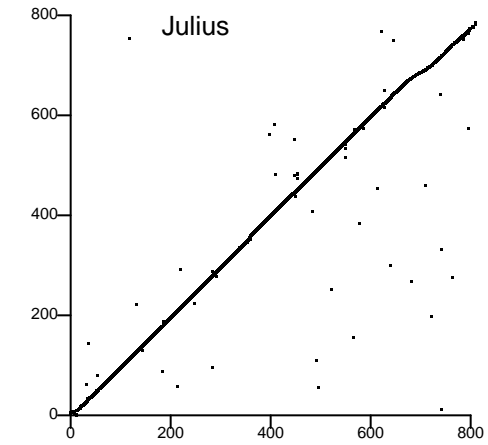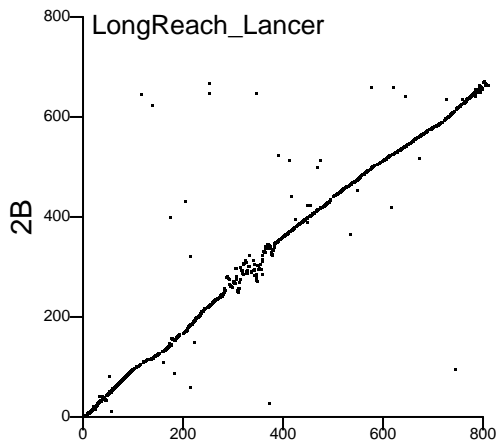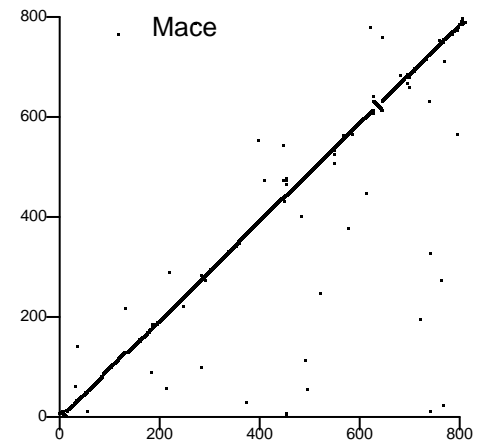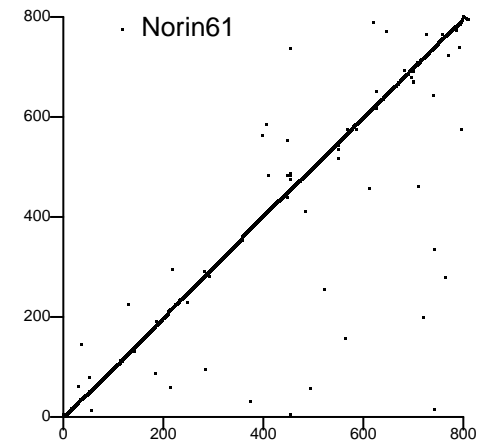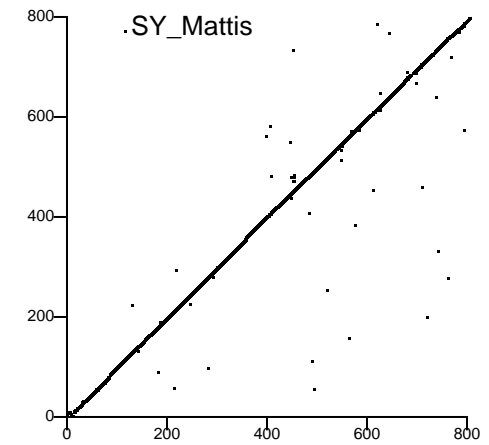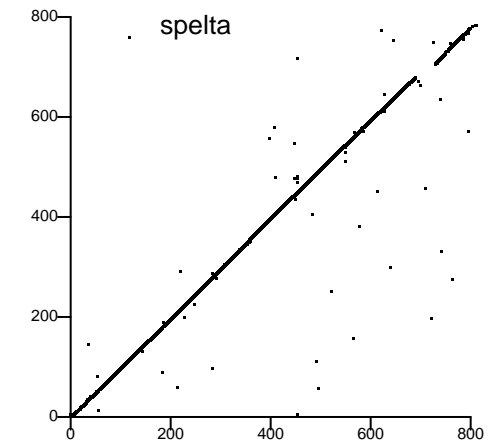

Renan chromosome 2B (Mb)

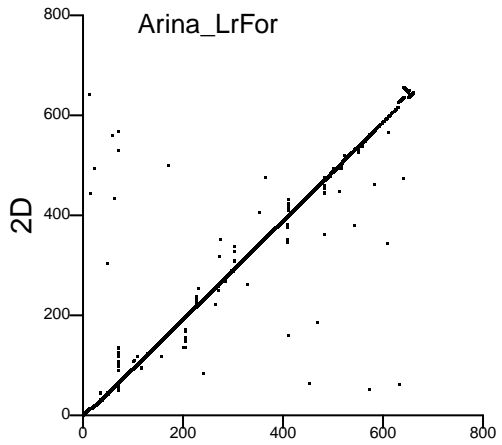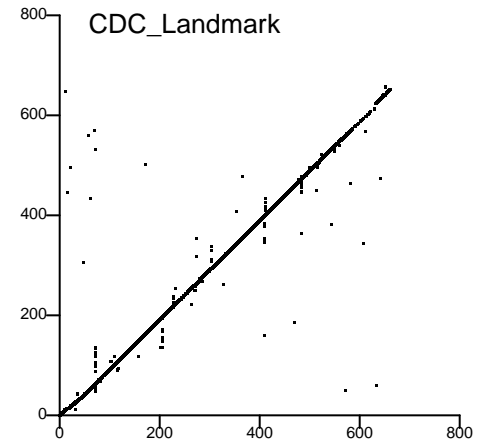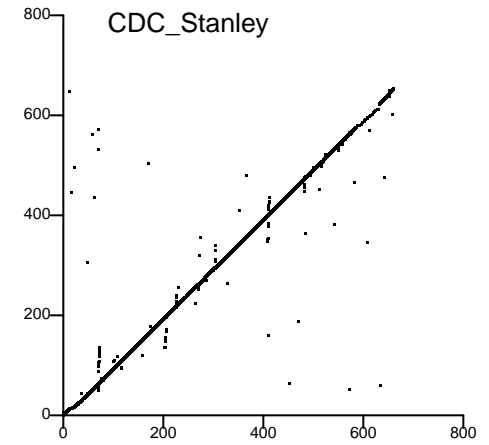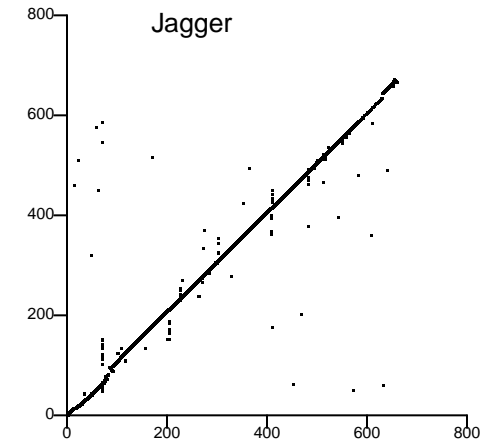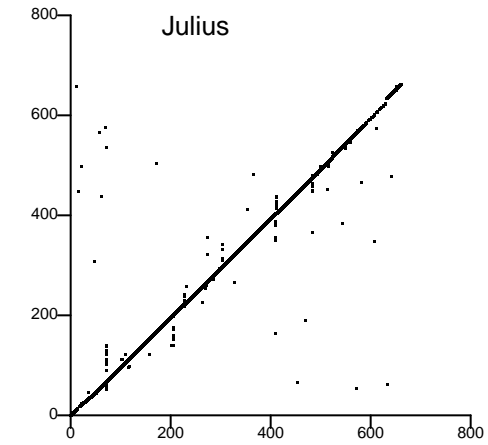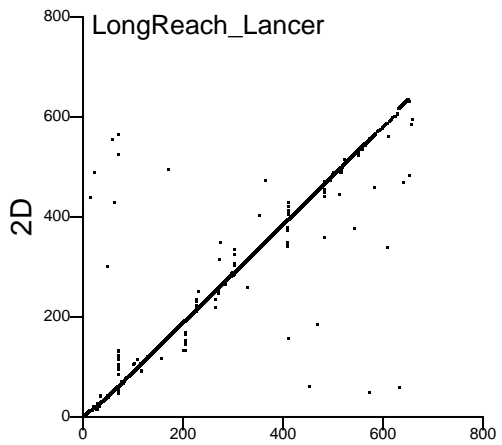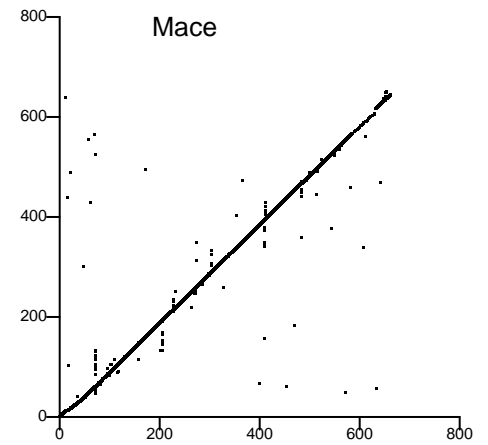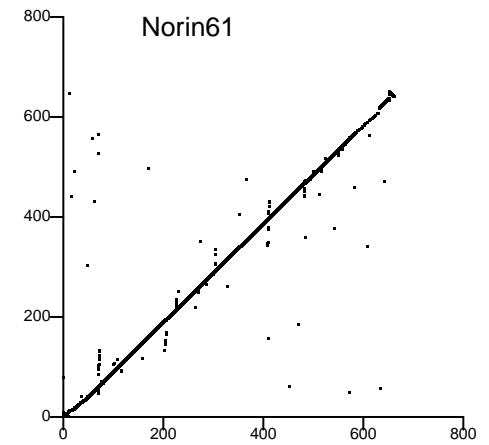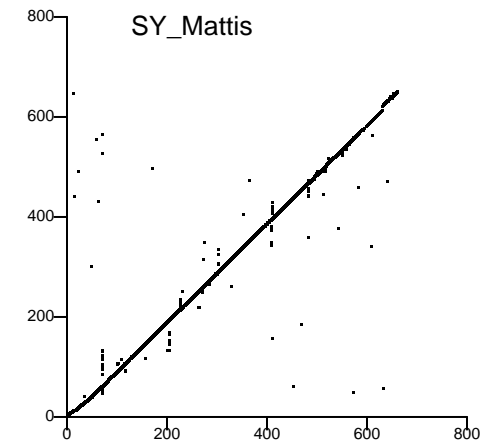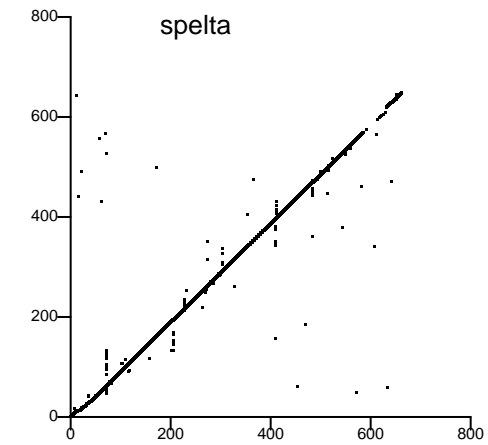

Renan chromosome 2D (Mb)

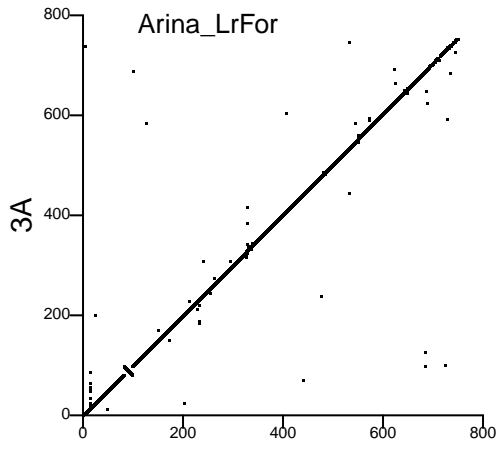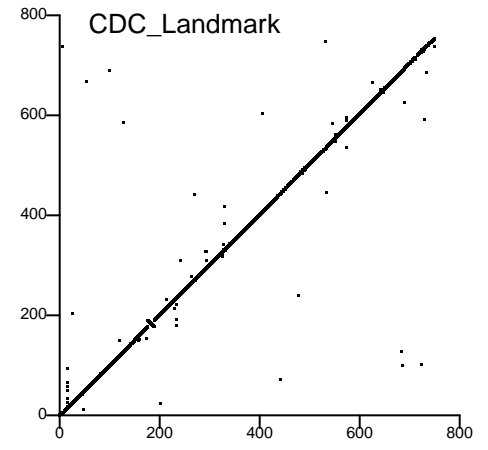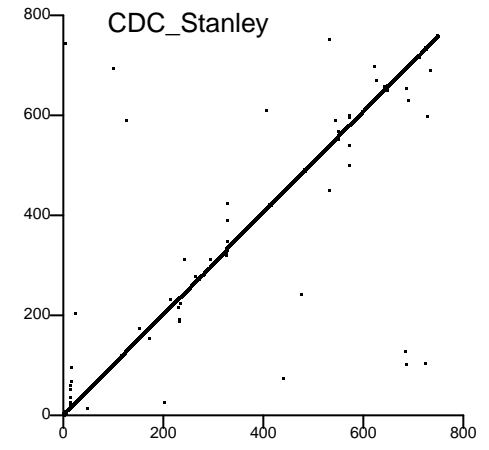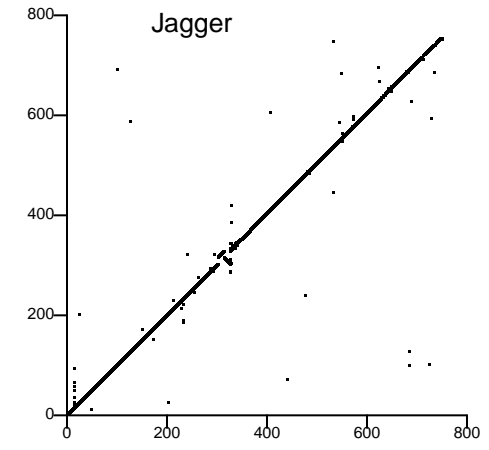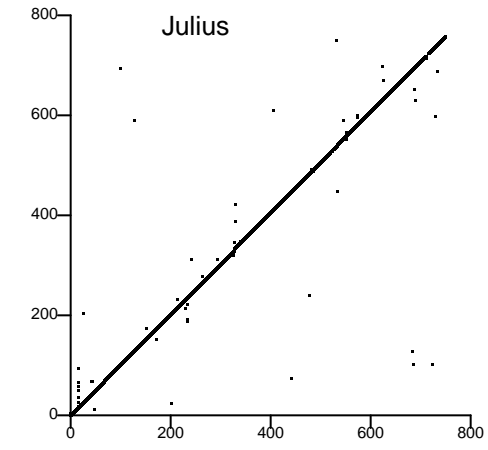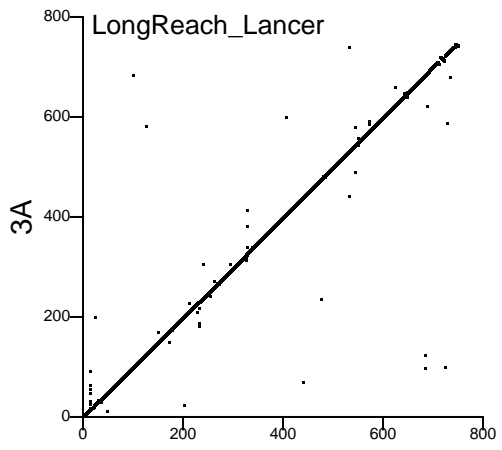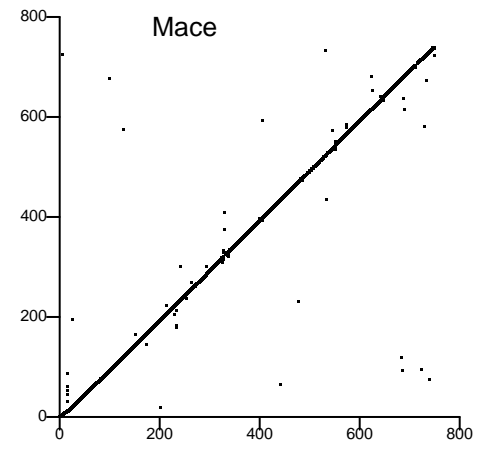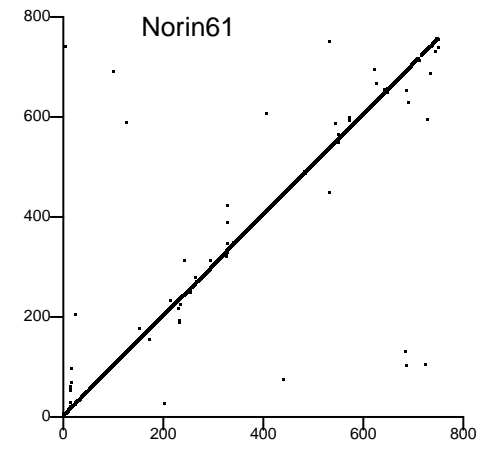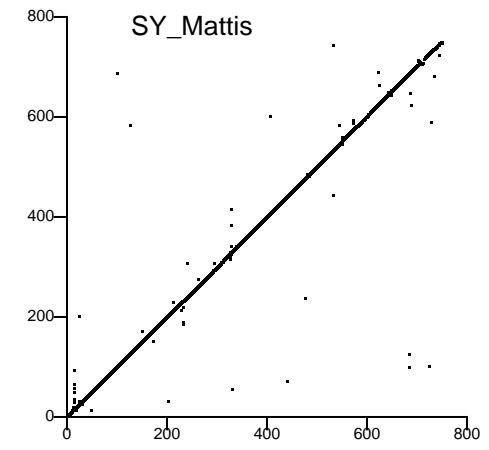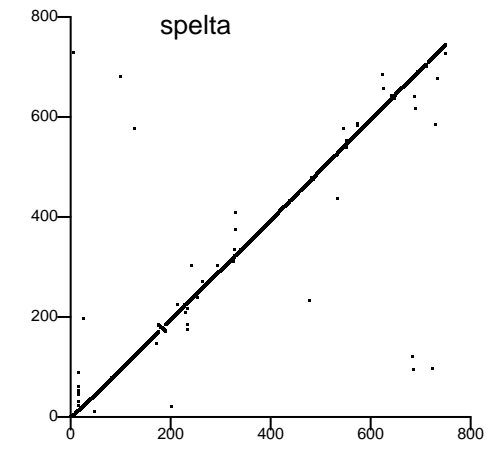

Renan chromosome 3A (Mb)

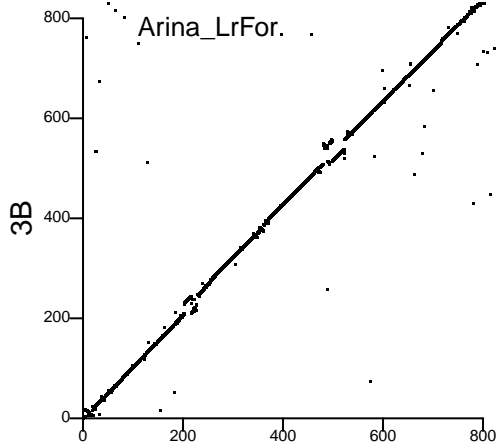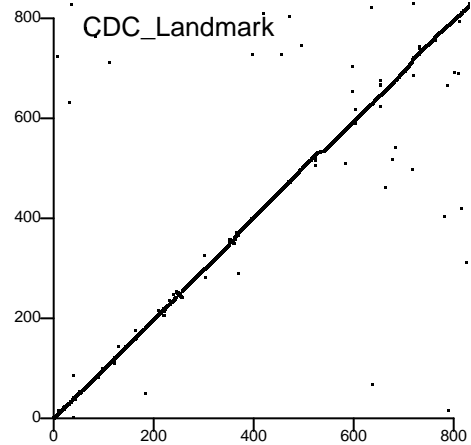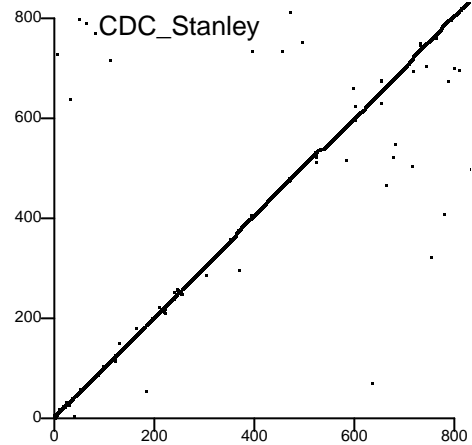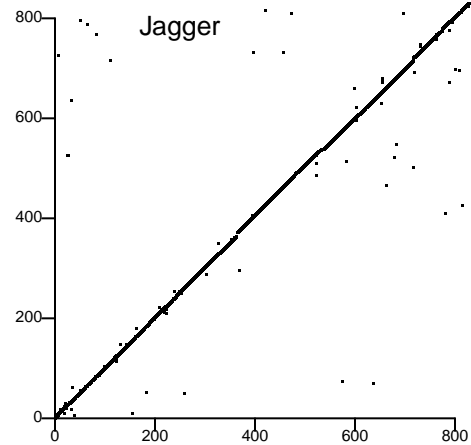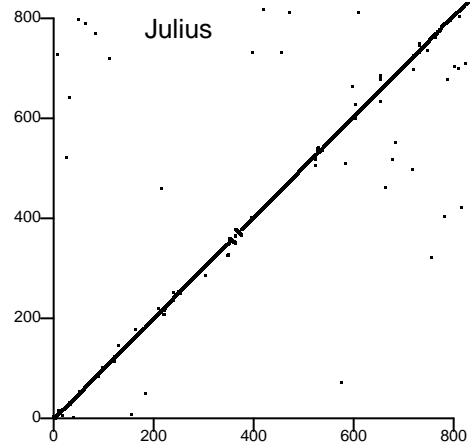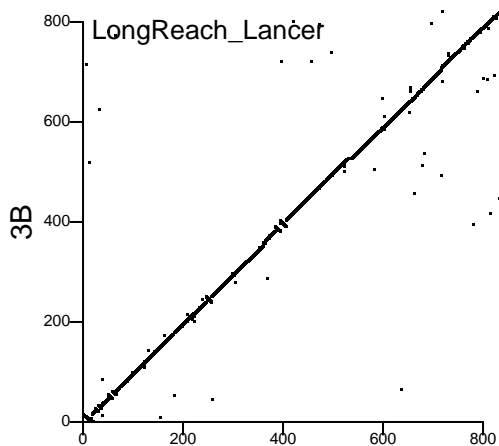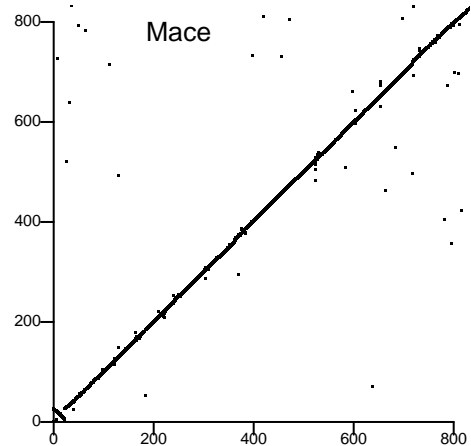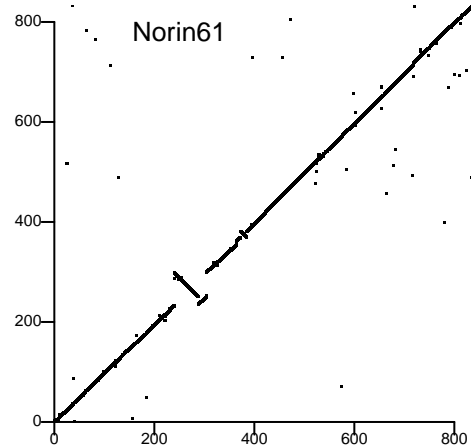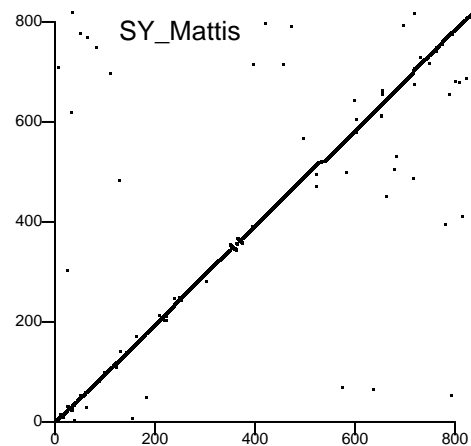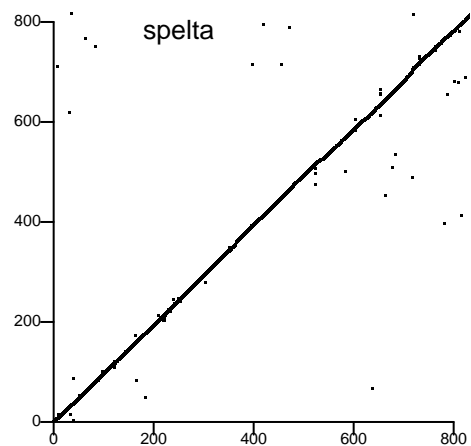

Renan chromosome 3B (Mb)

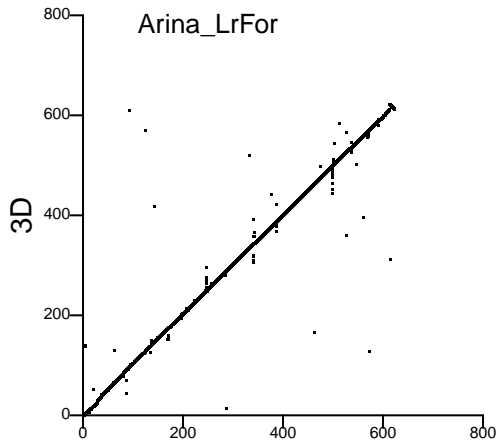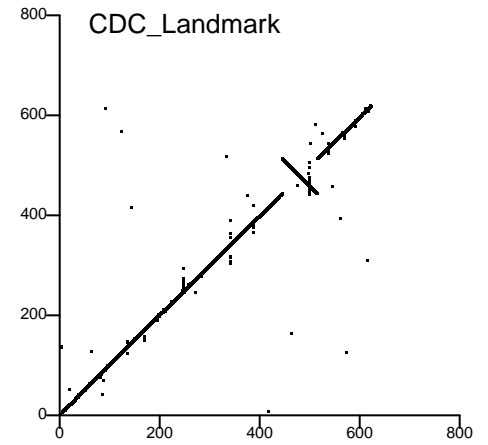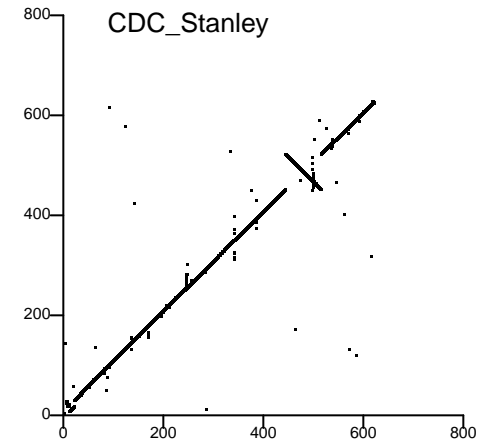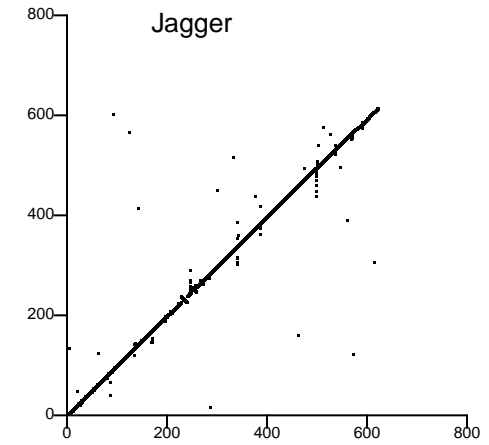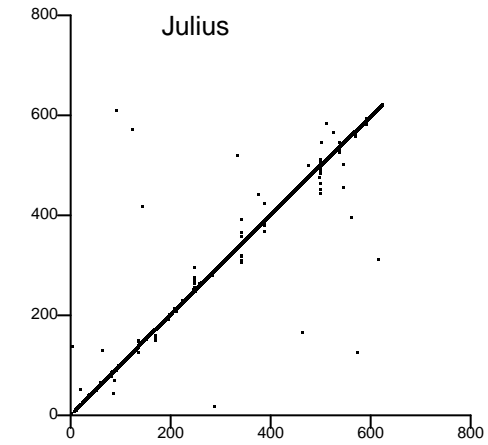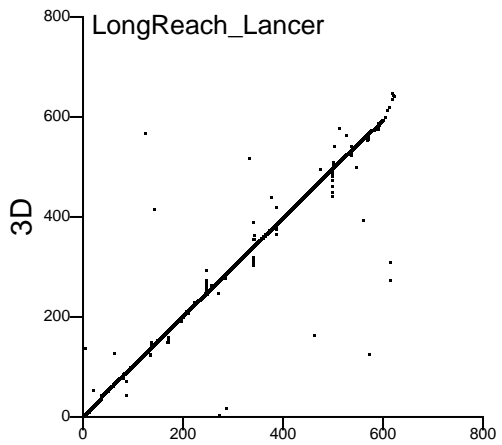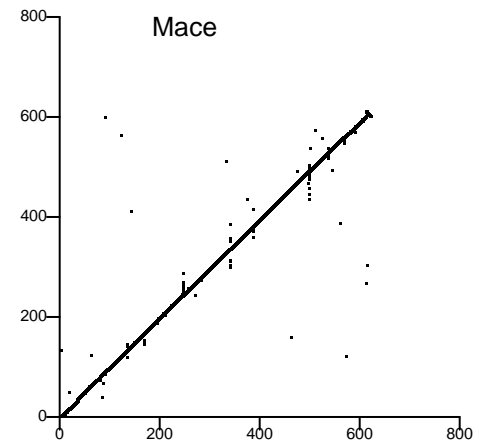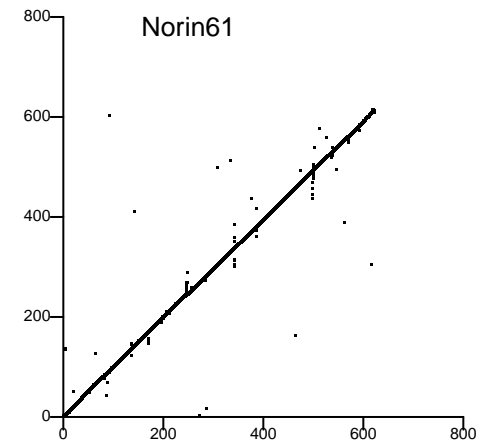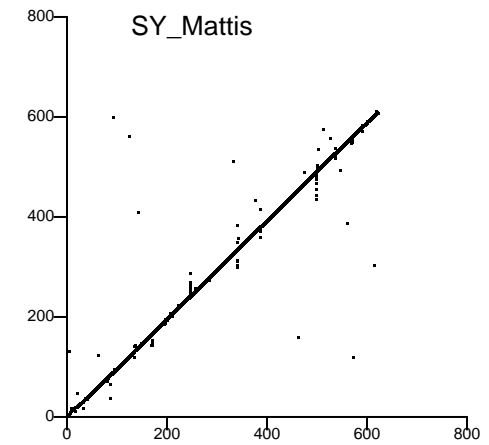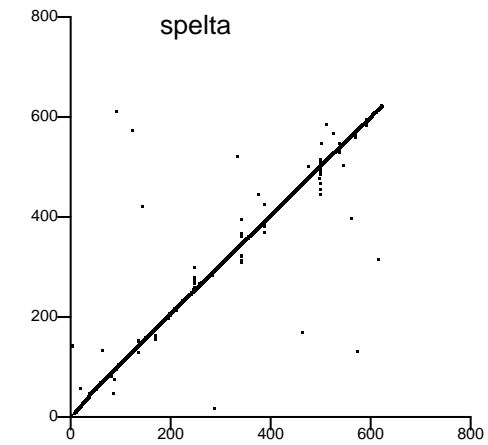

Renan chromosome 3D (Mb)

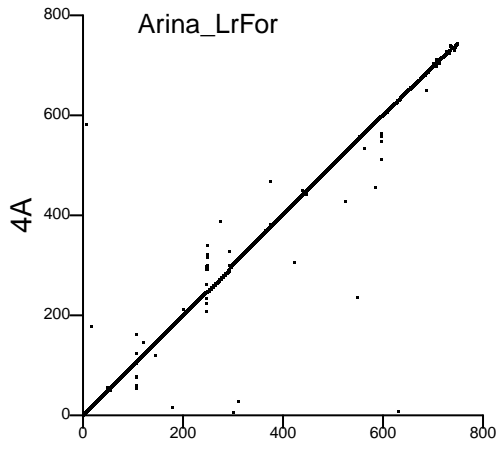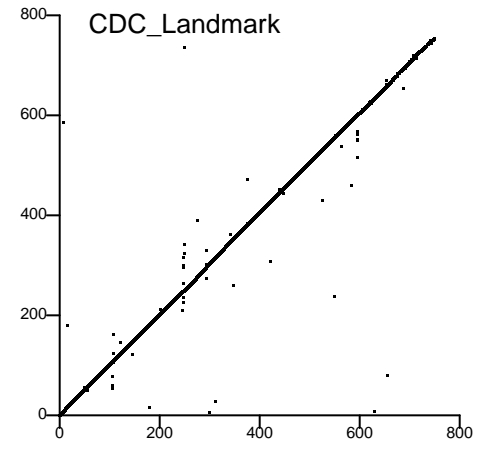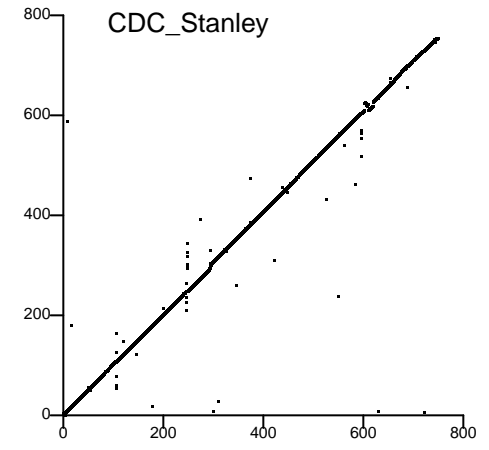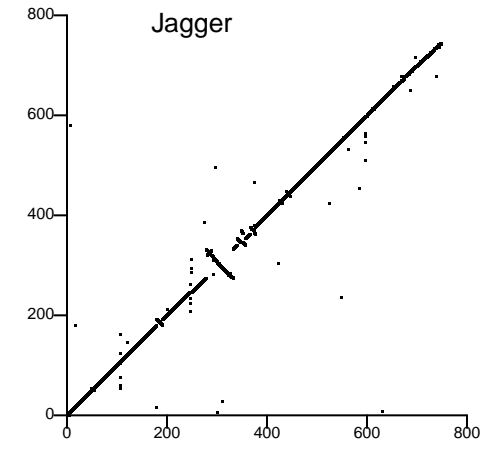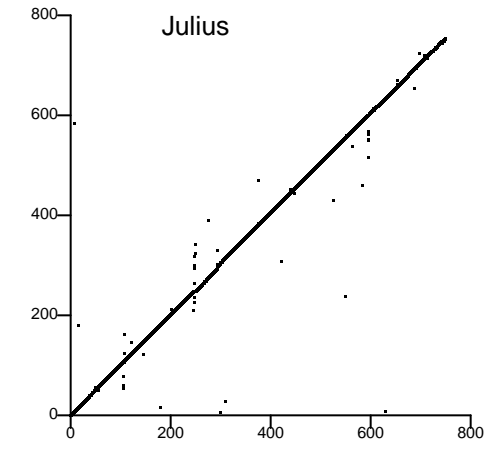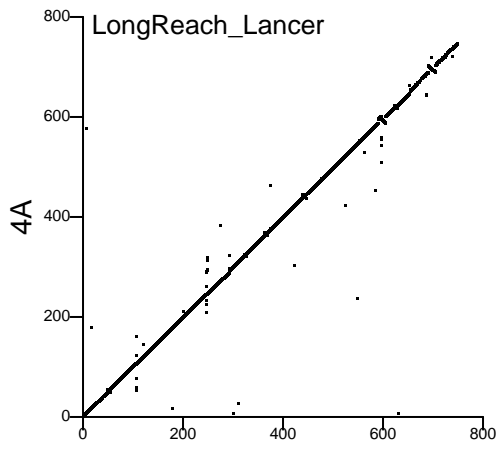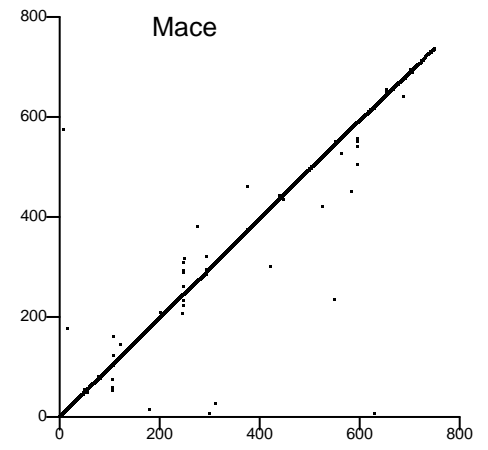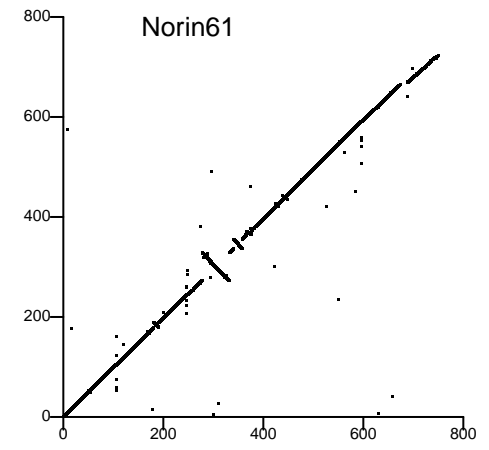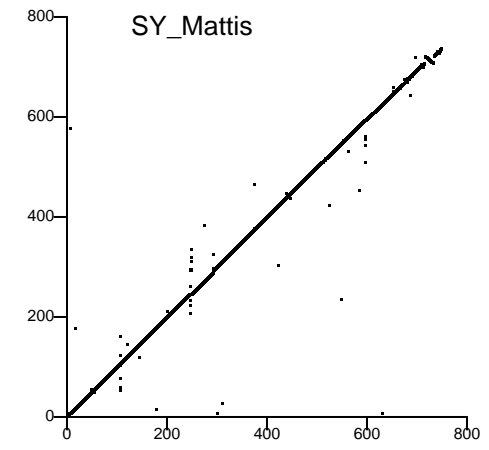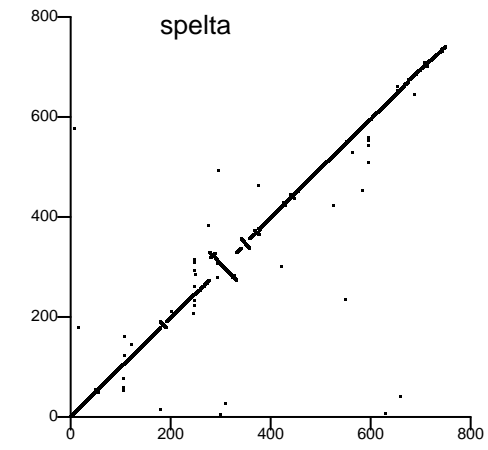

Renan chromosome 4A (Mb)

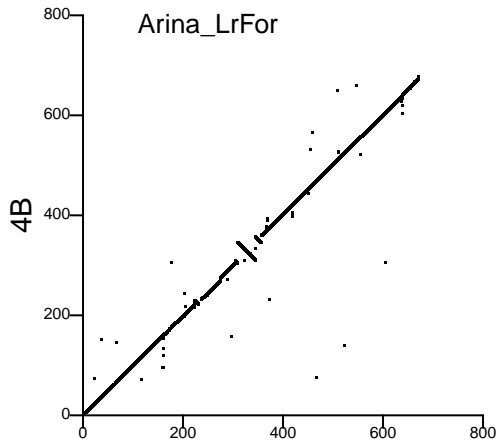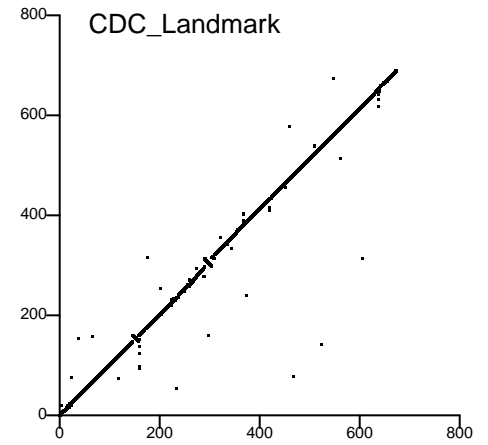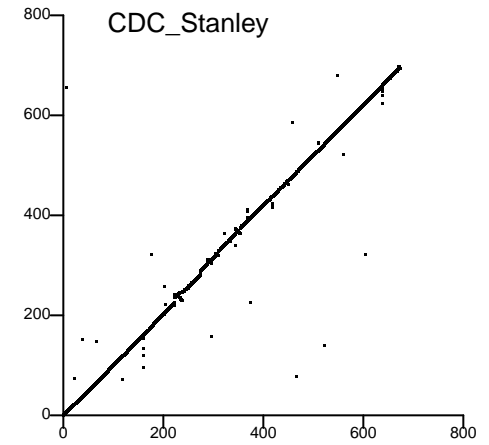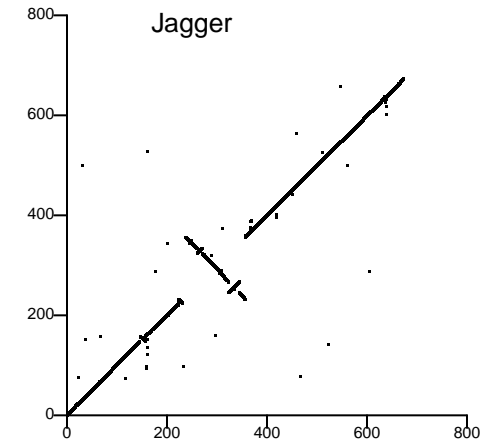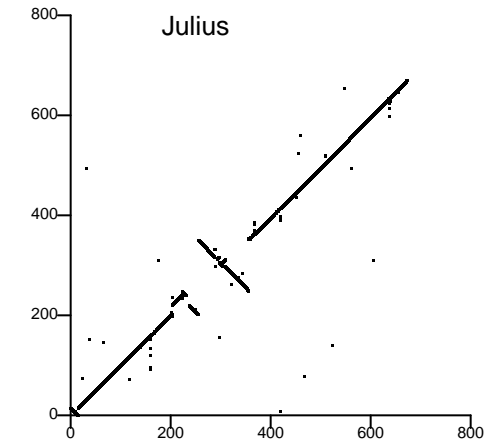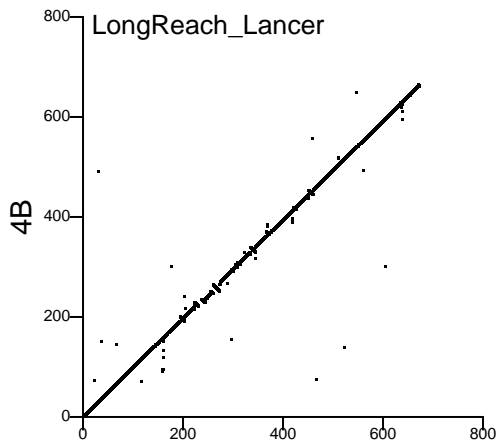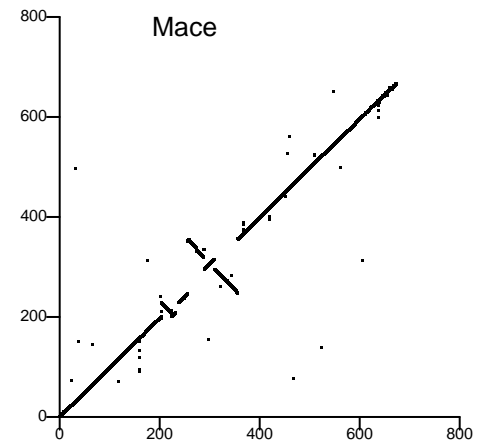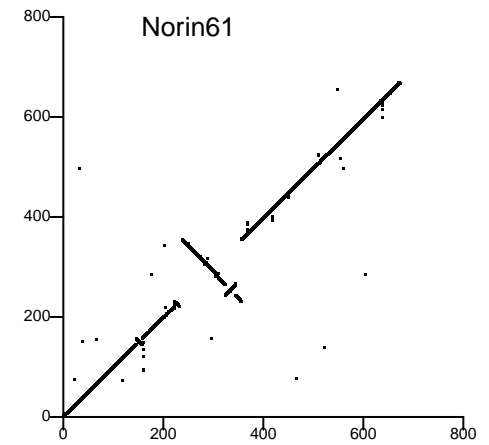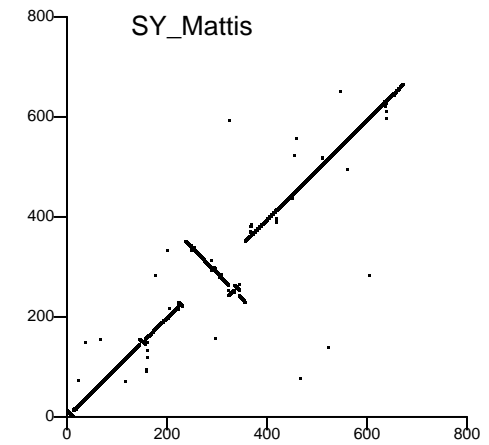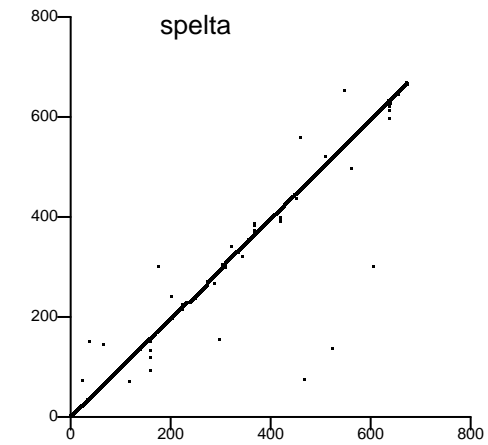

Renan chromosome 4B (Mb)

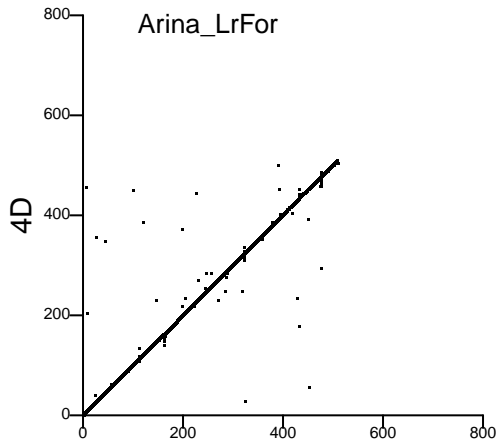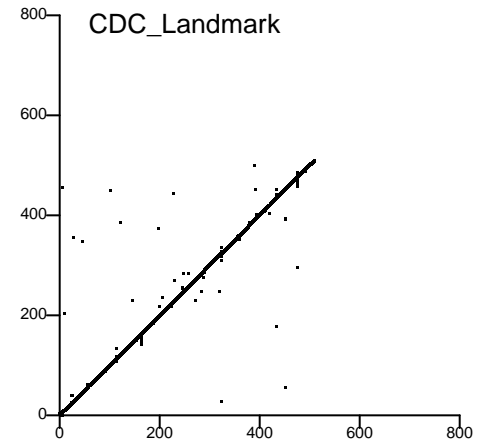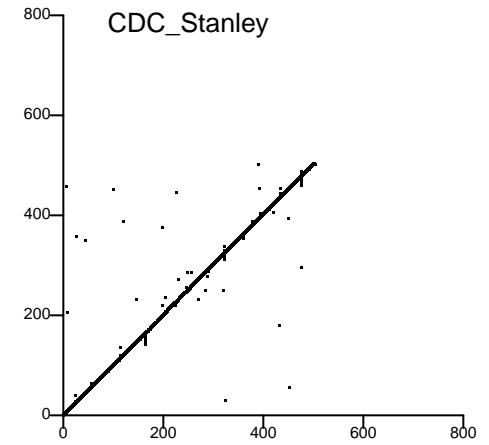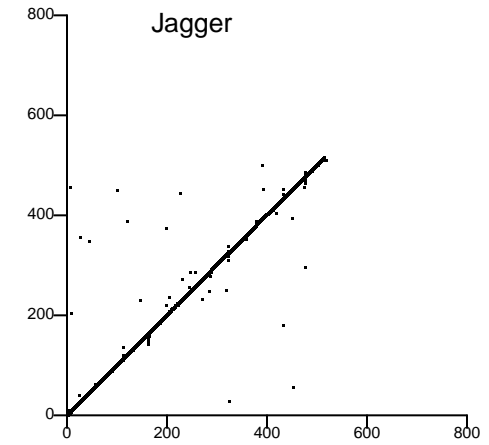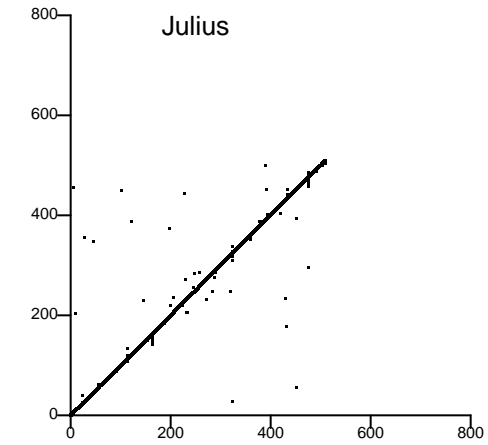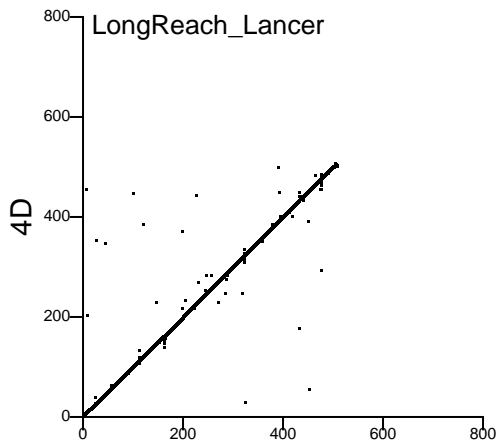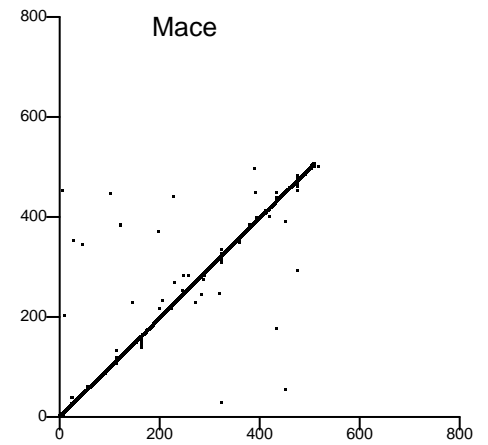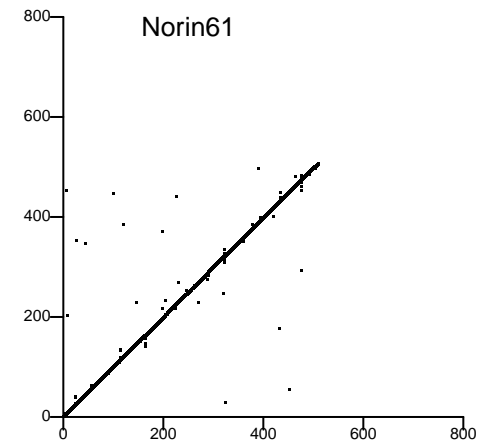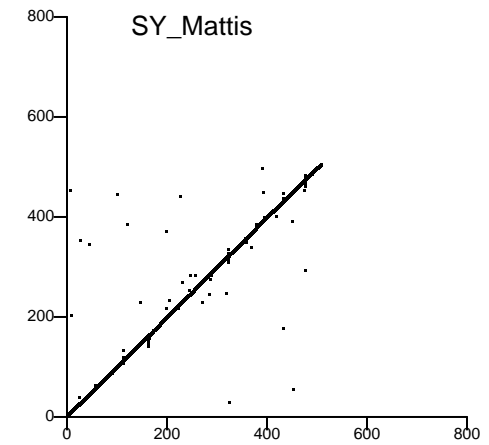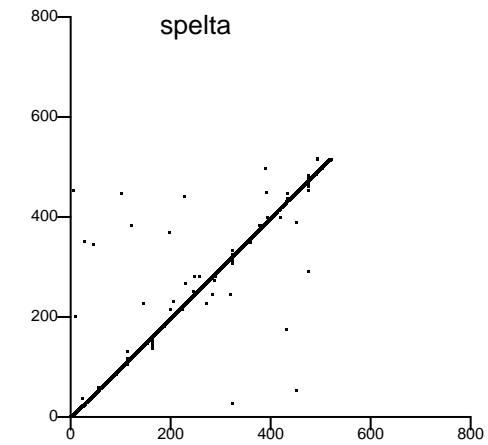

Renan chromosome 4D (Mb)



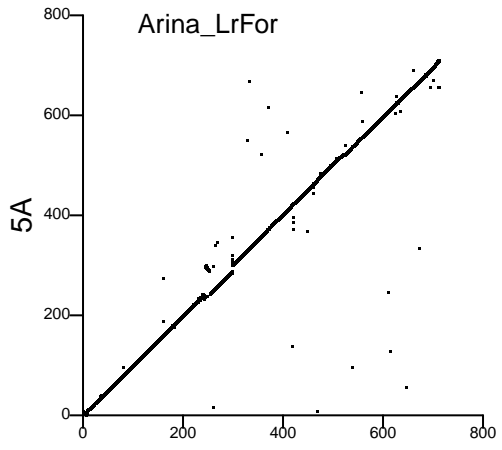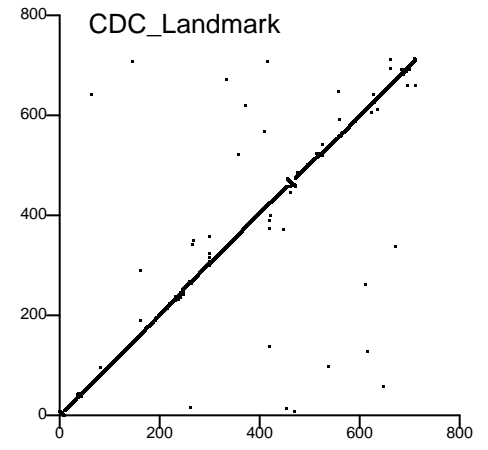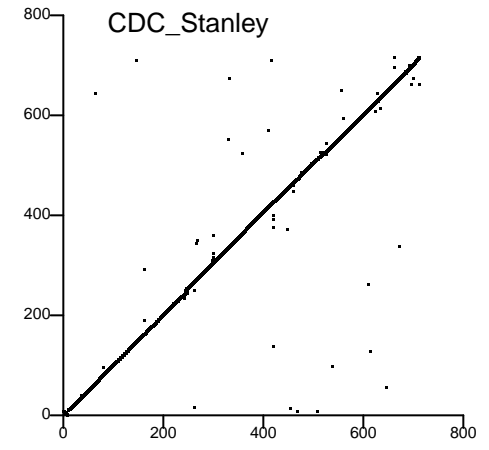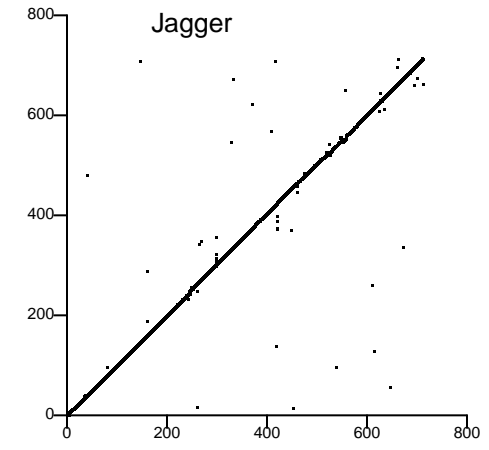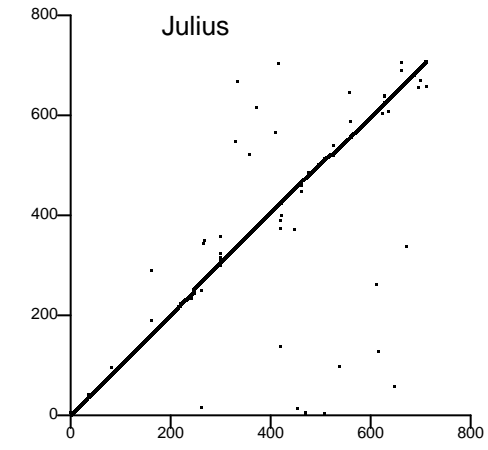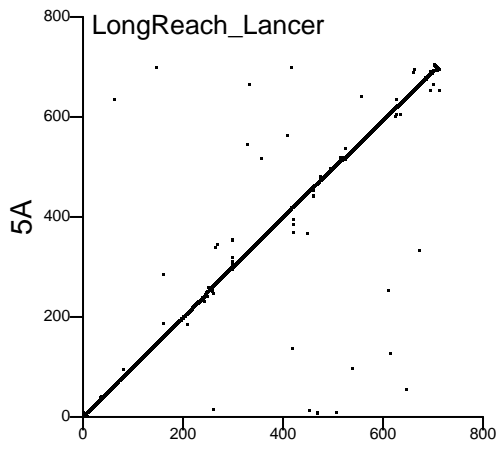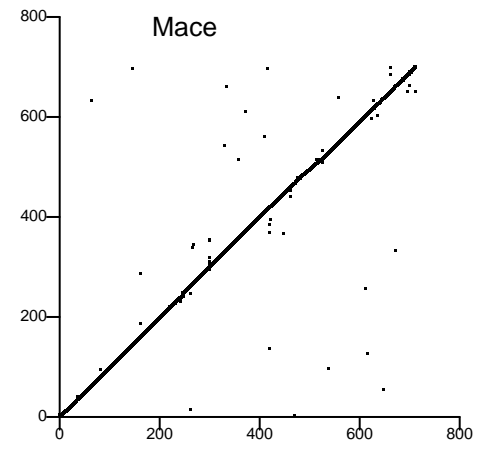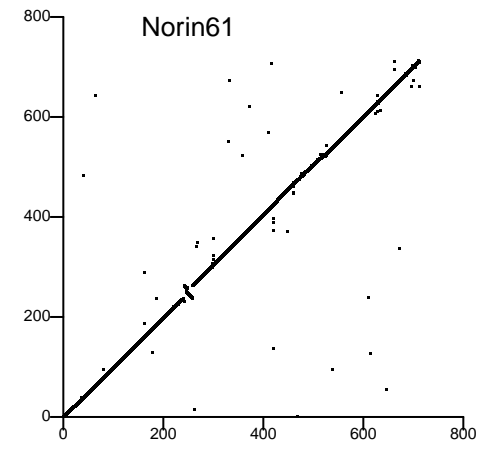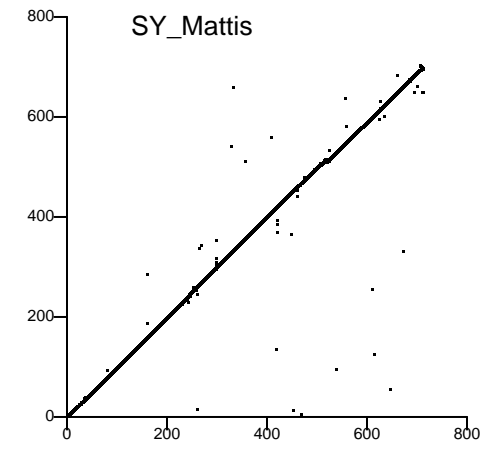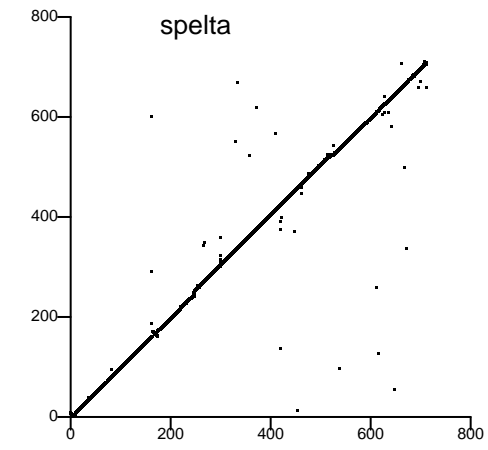

Renan chromosome 5A (Mb)

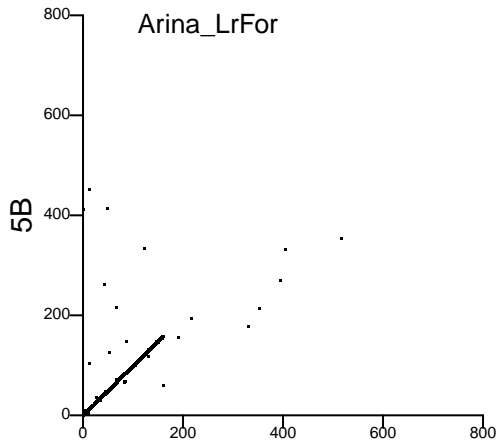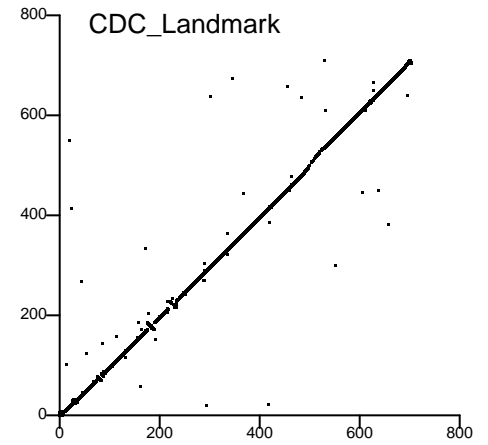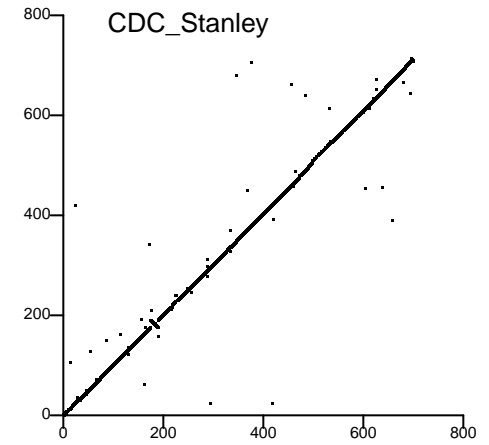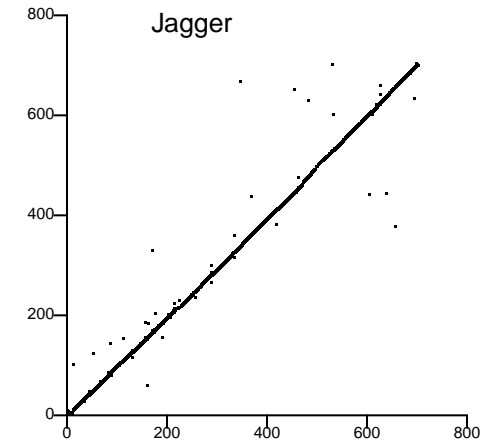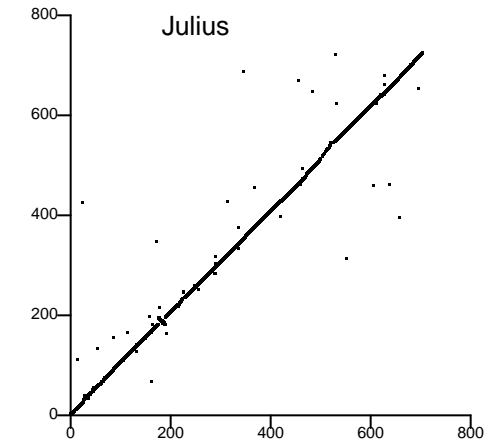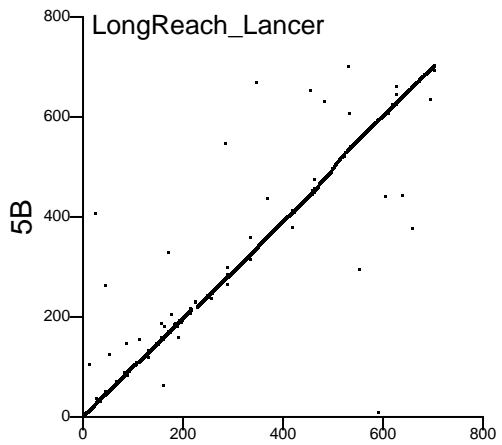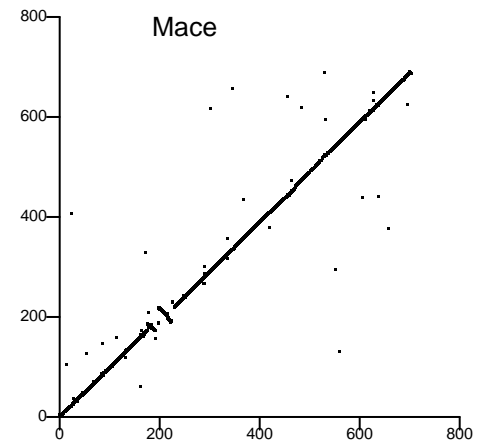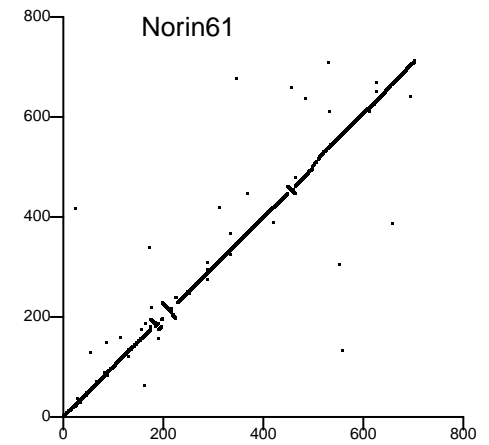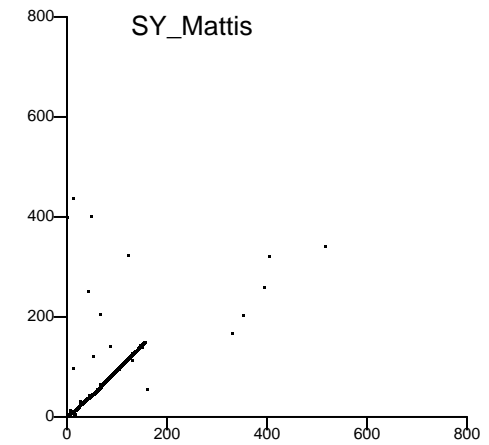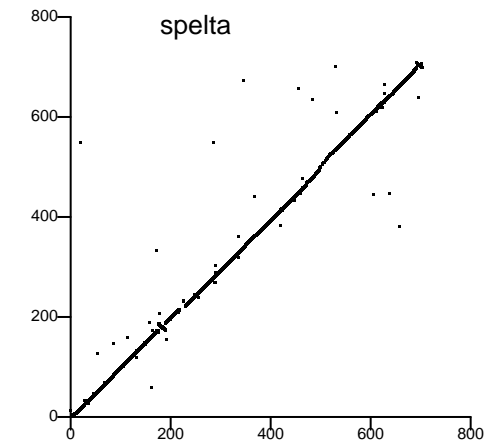

Renan chromosome 5B (Mb)

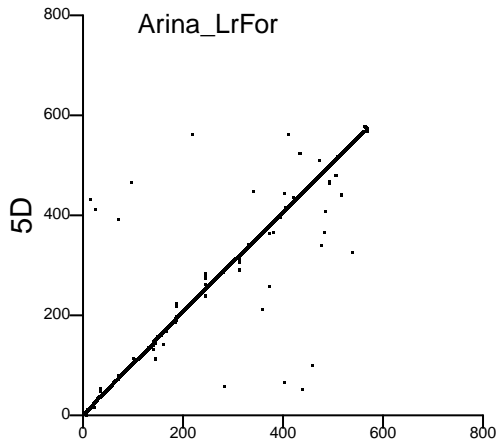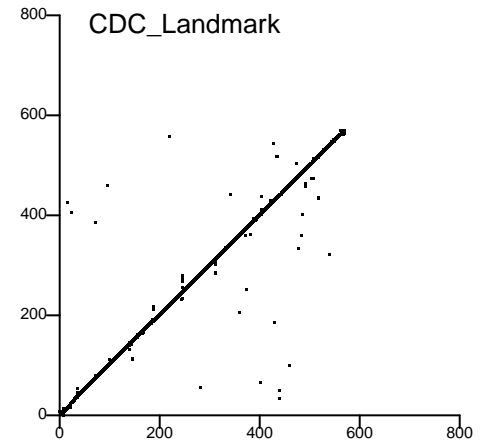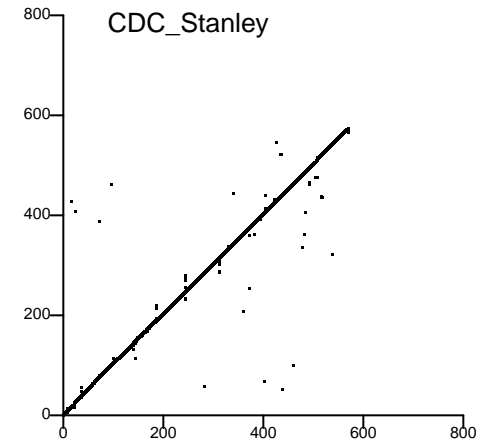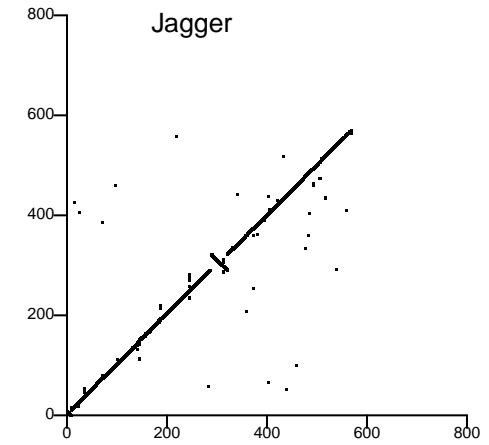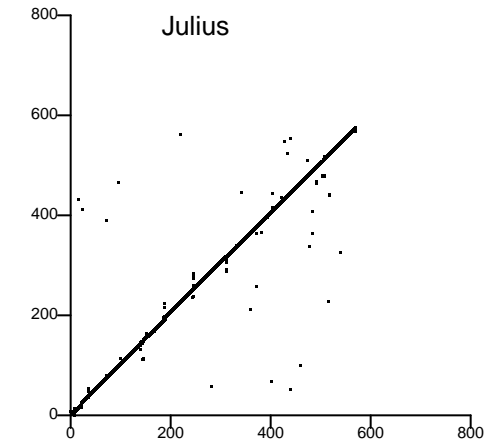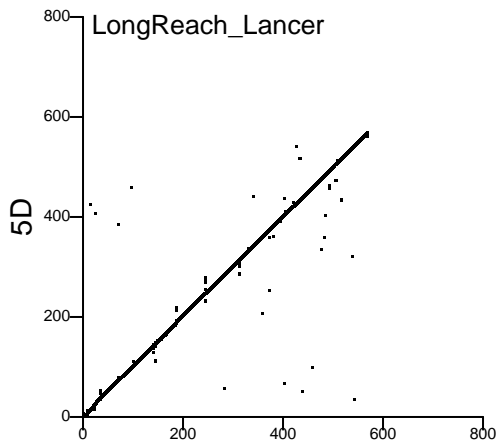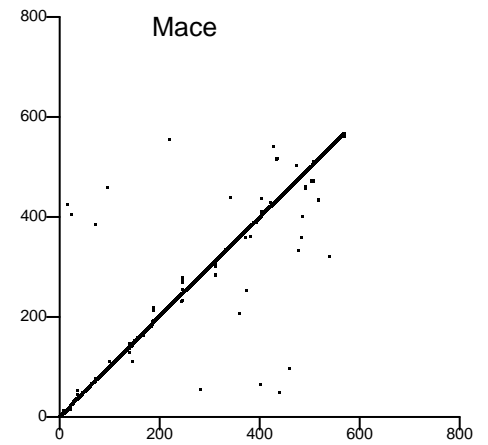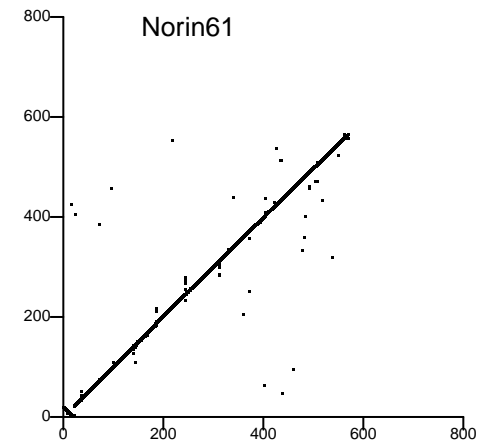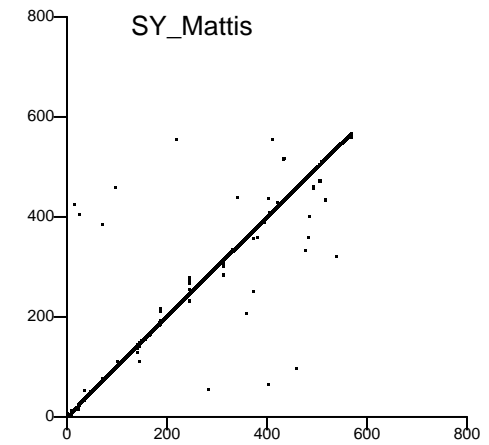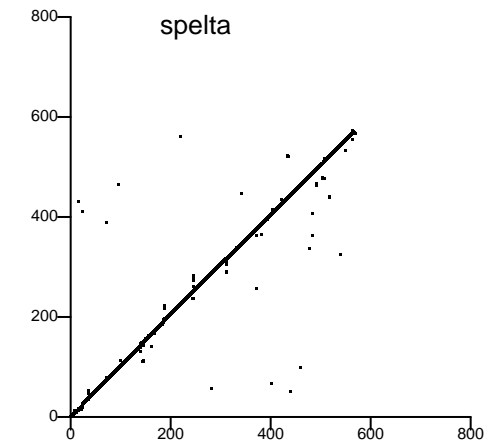

Renan chromosome 5D (Mb)

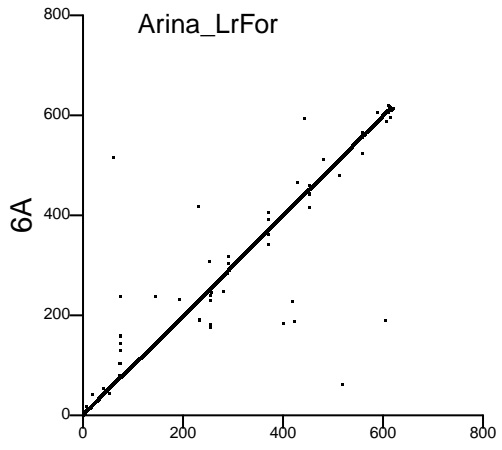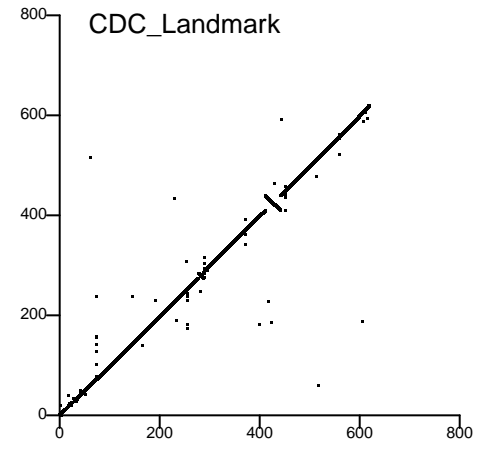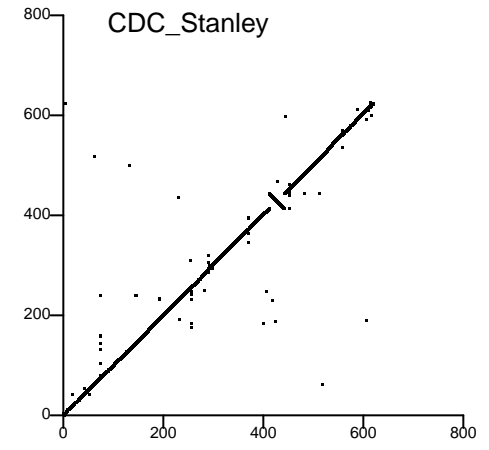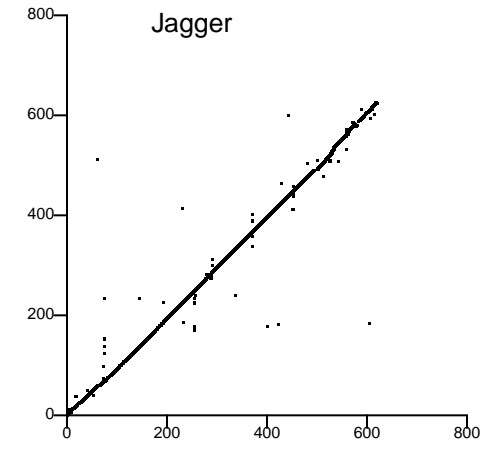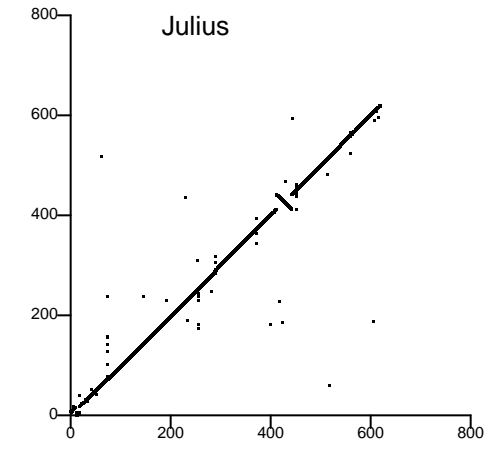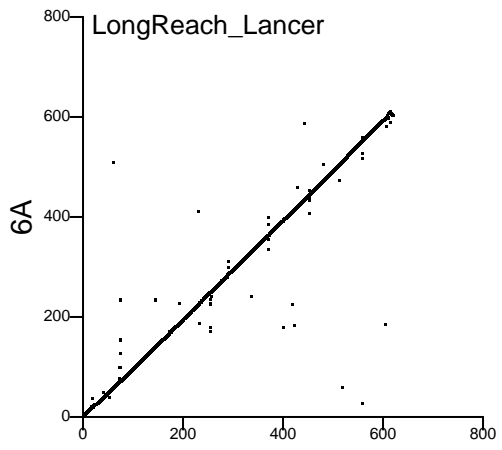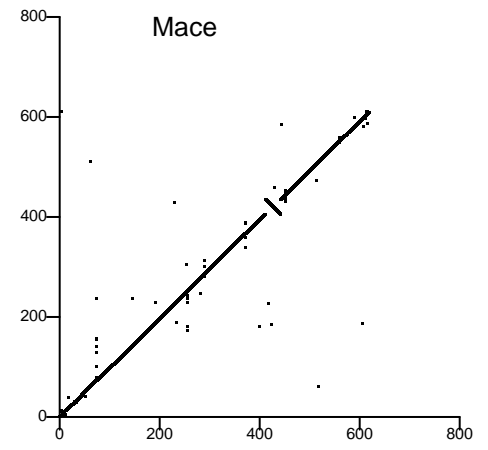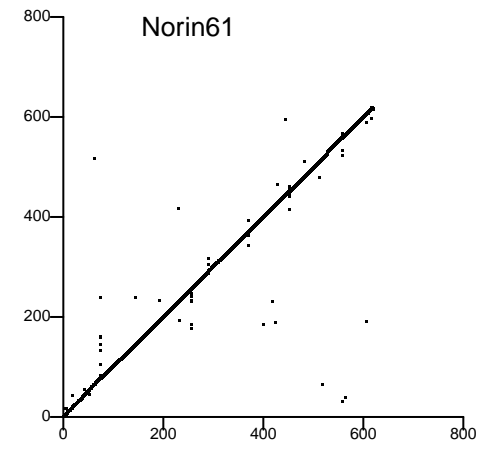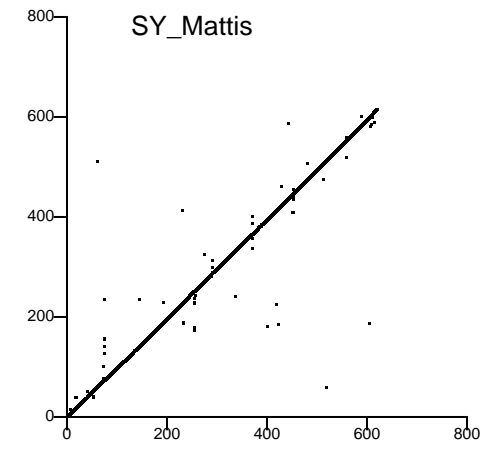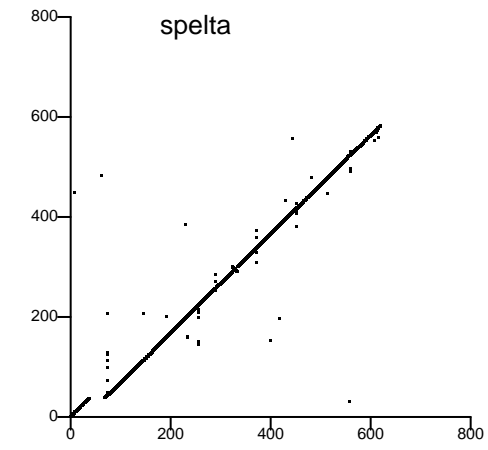

Renan chromosome 6A (Mb)

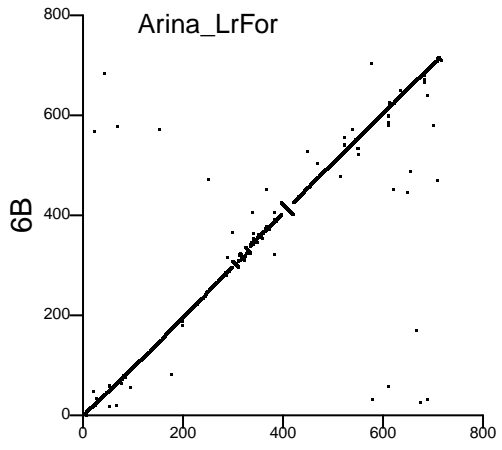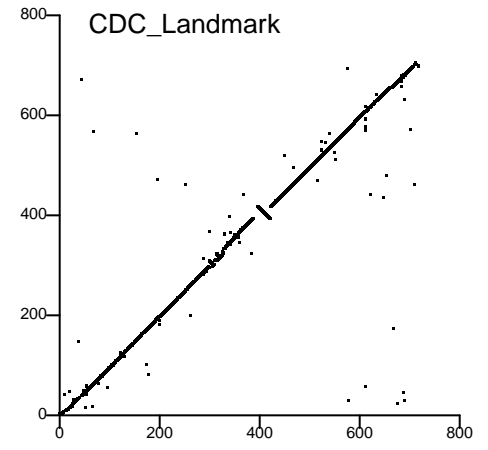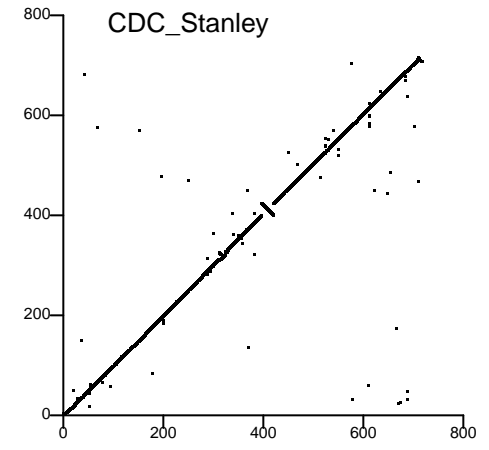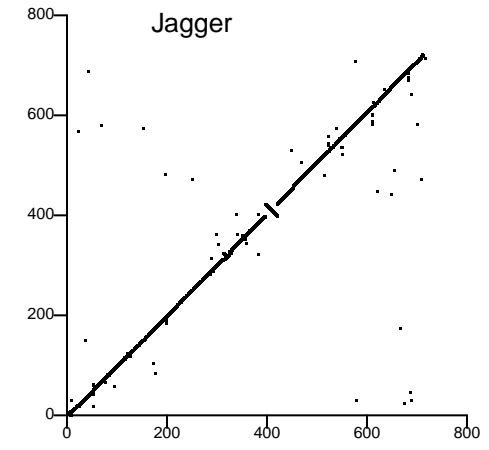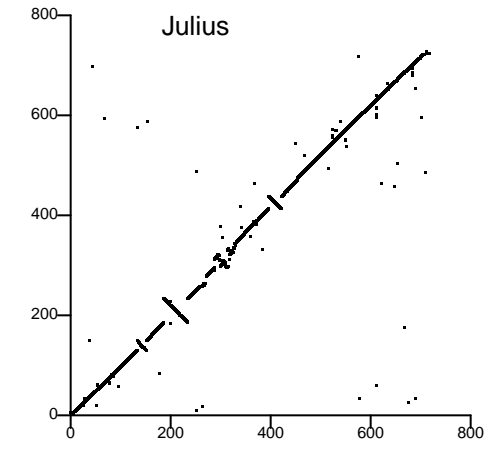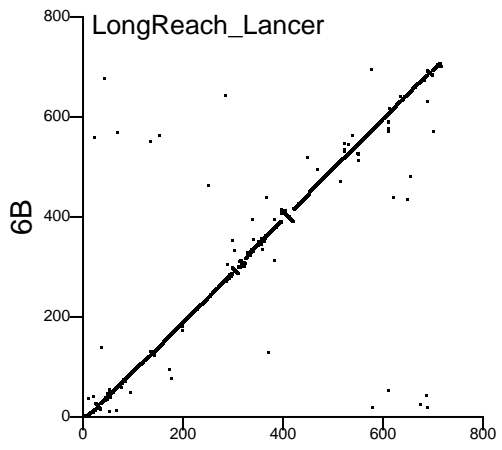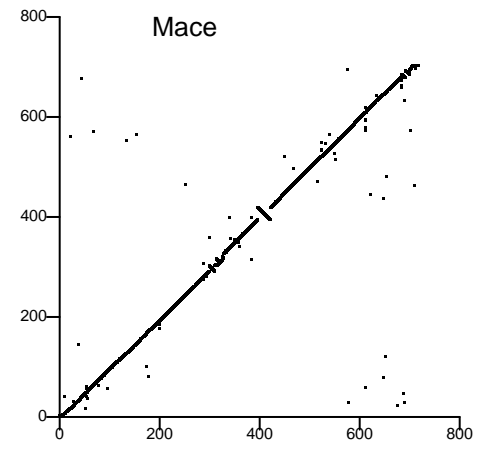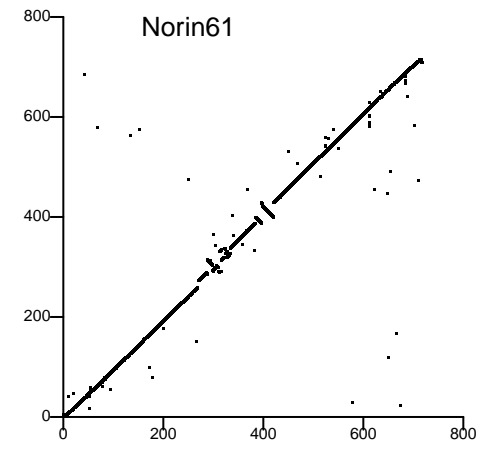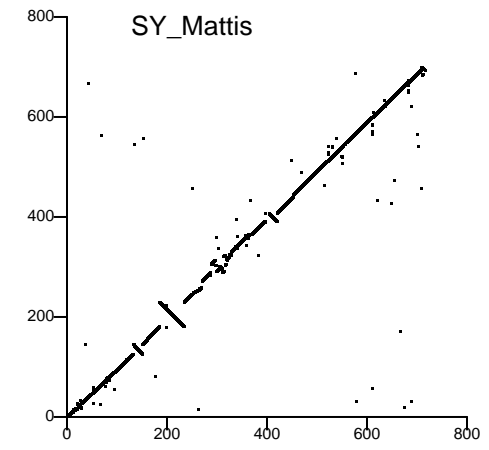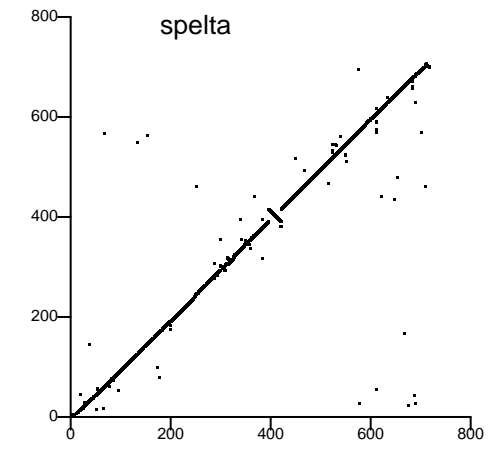

Renan chromosome 6B (Mb)

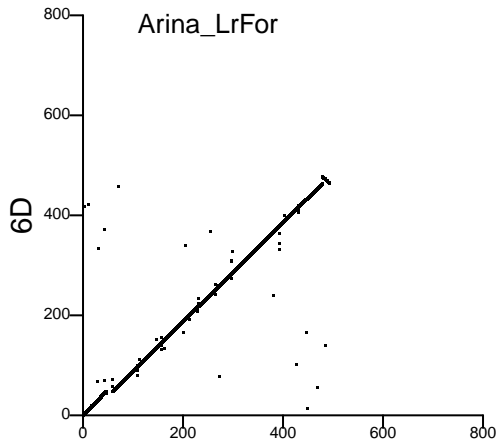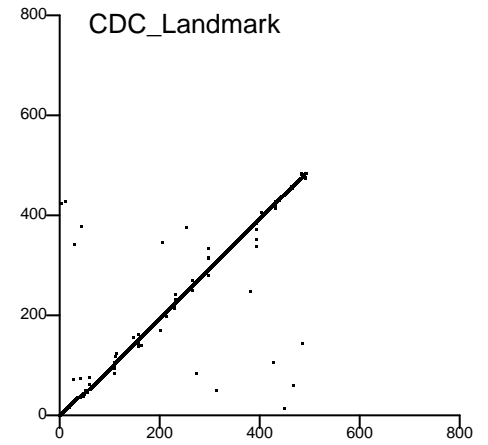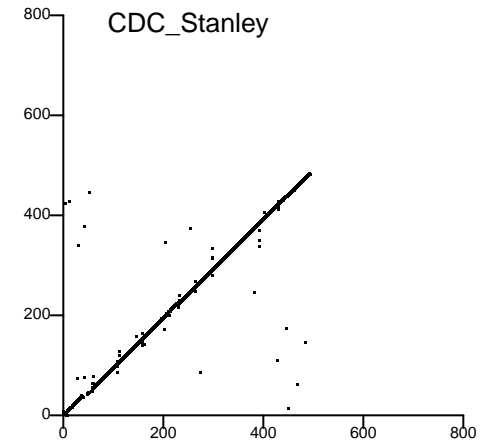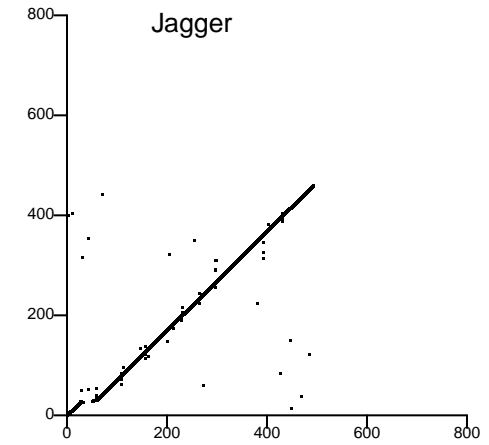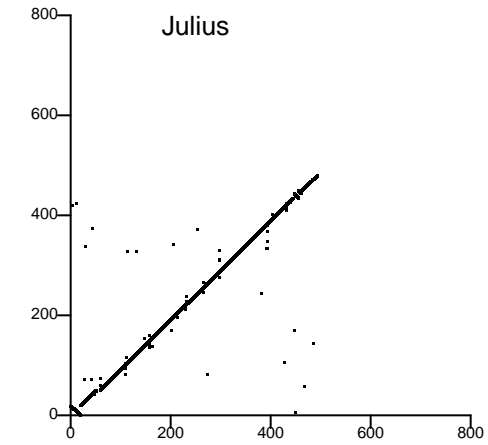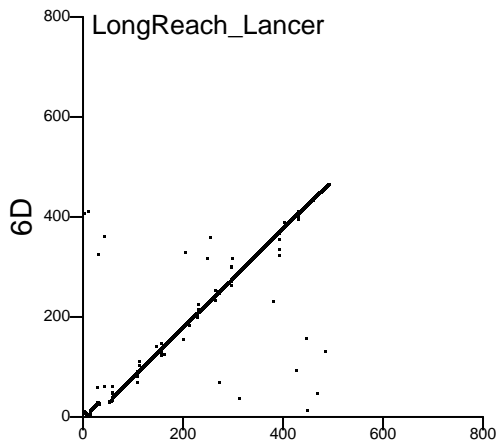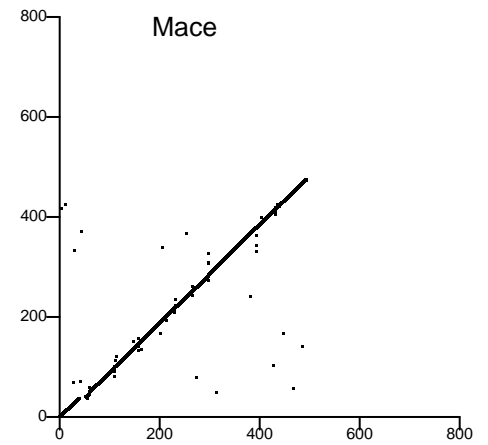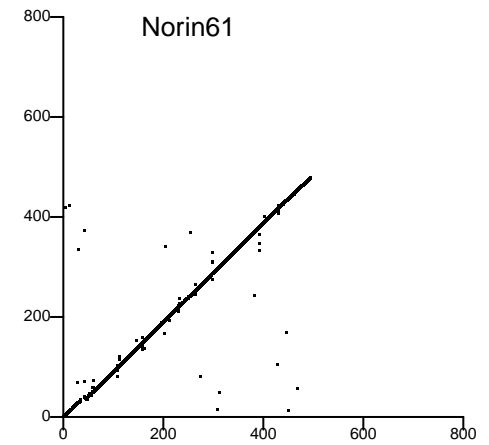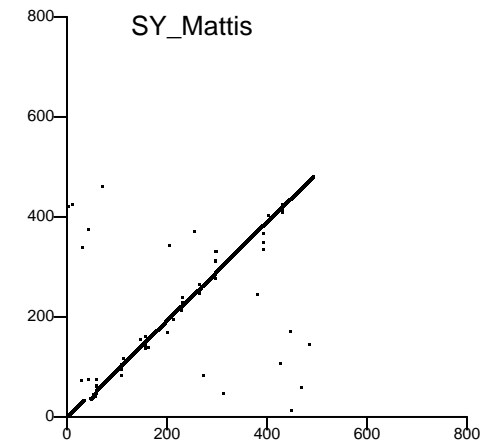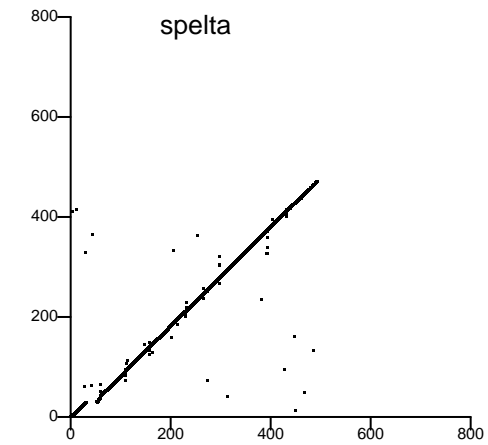

Renan chromosome 6D (Mb)

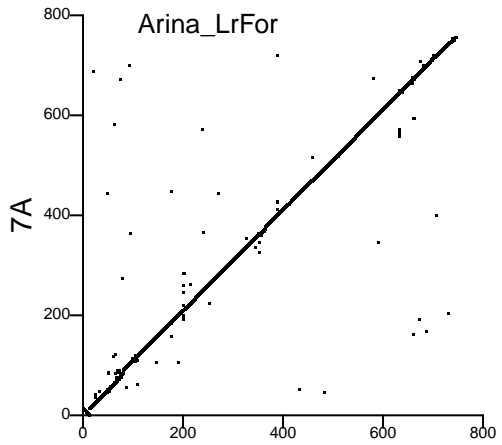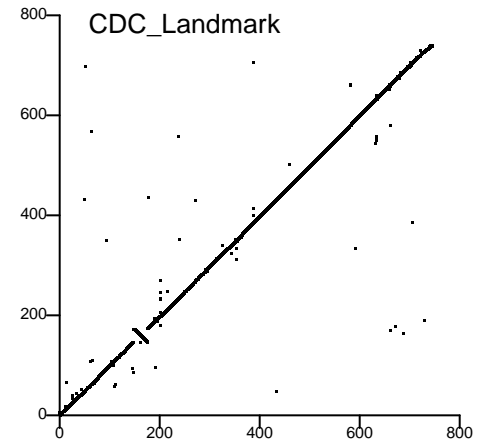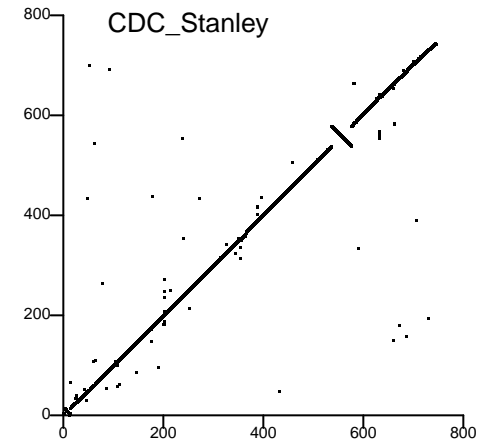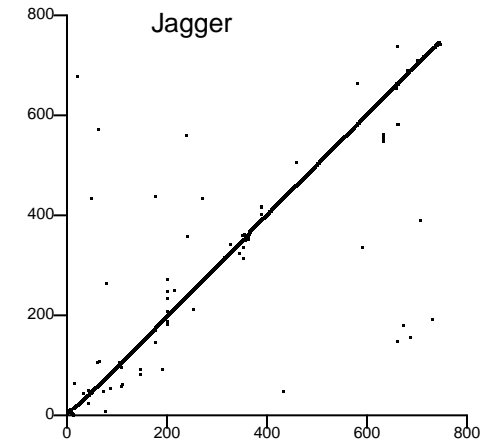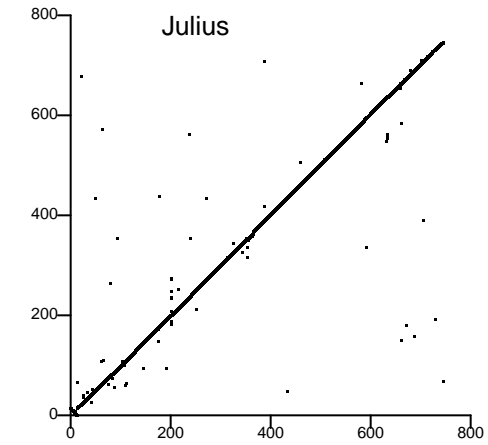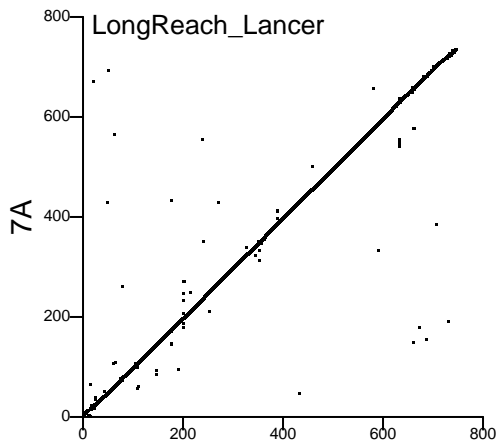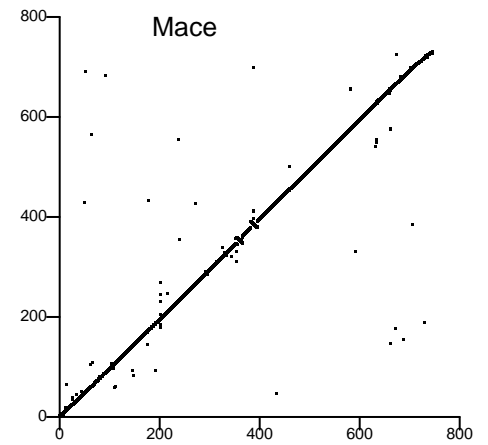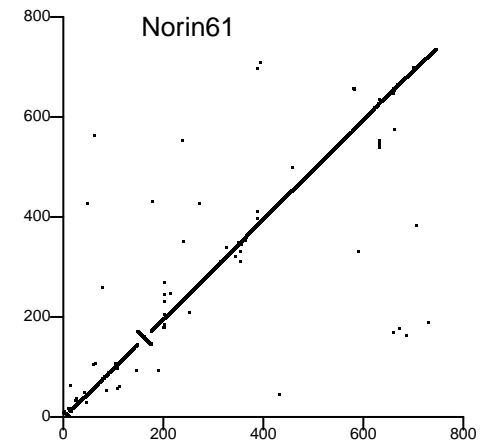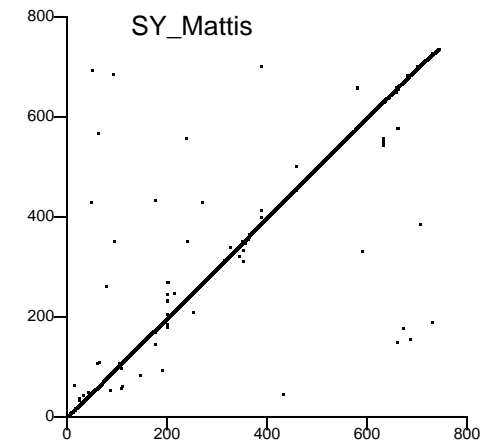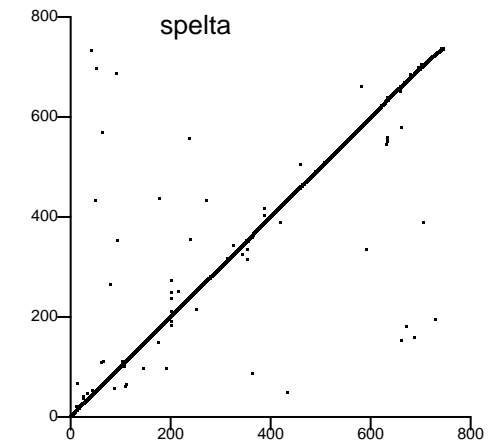

Renan chromosome 7A (Mb)

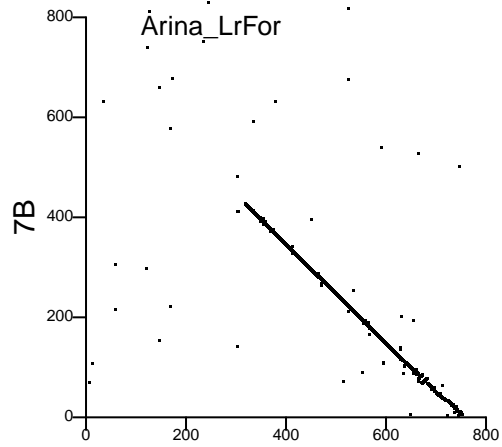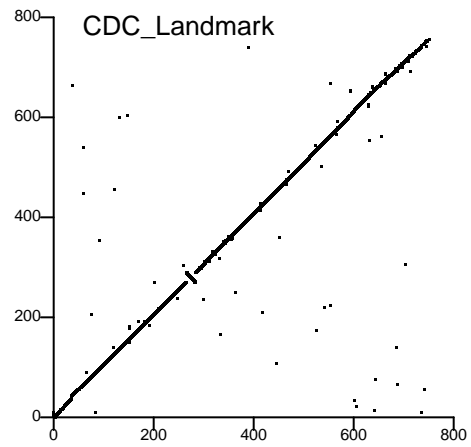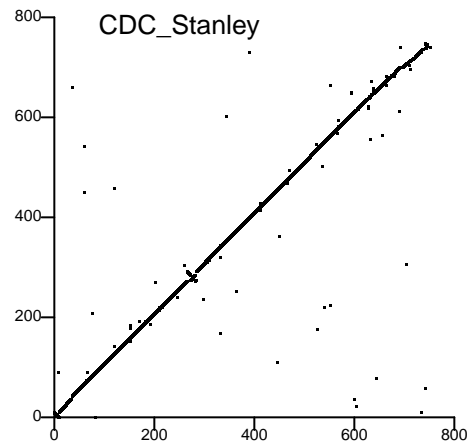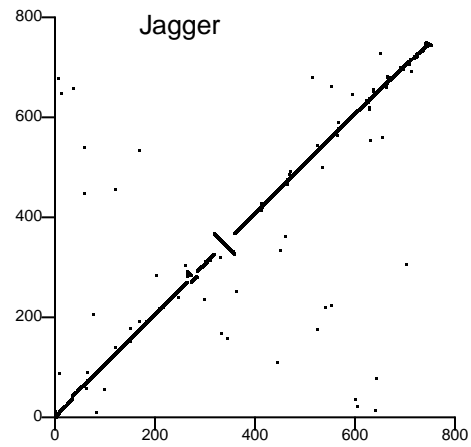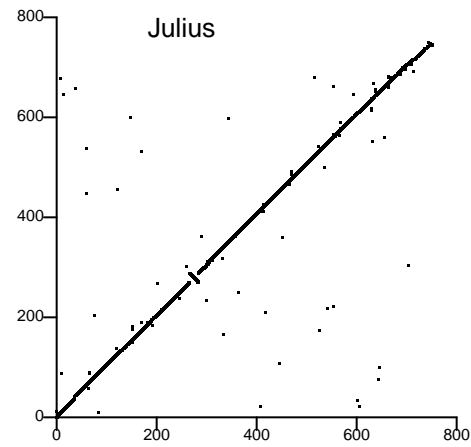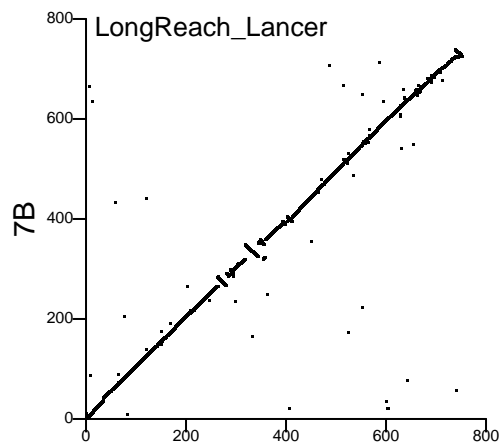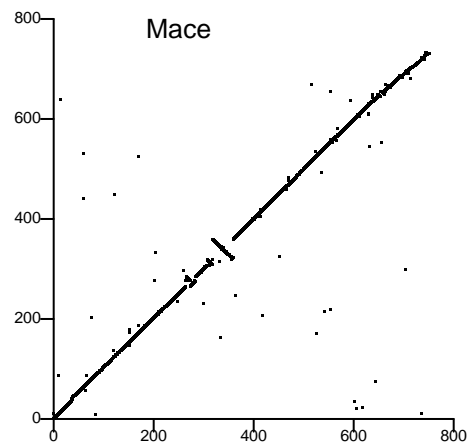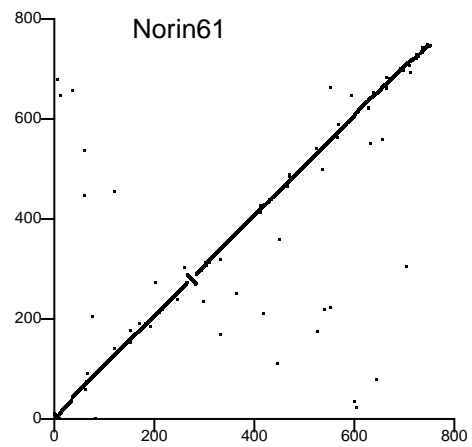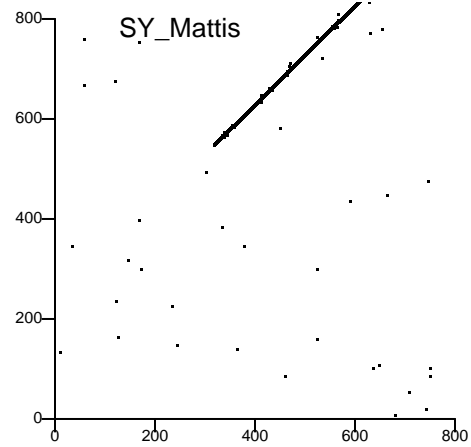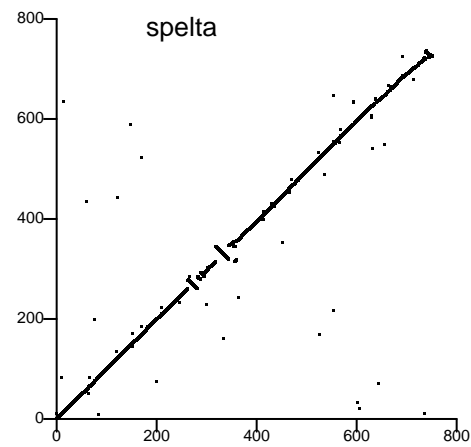

Renan chromosome 7B (Mb)



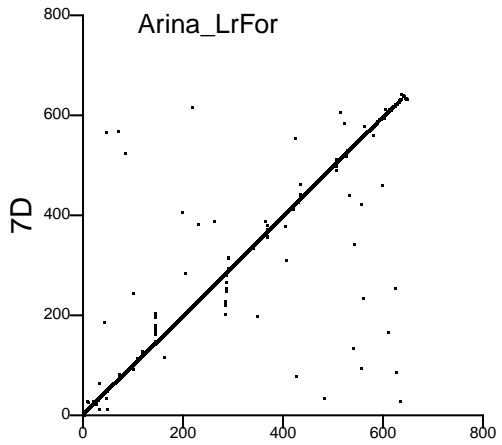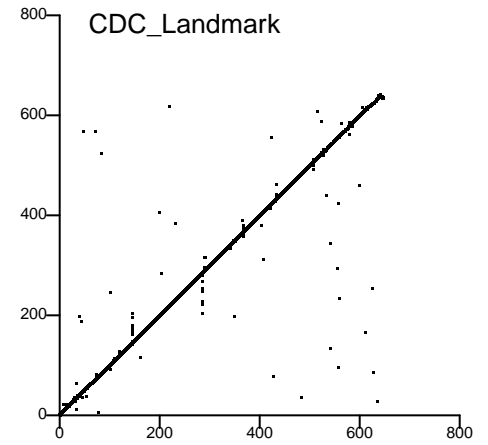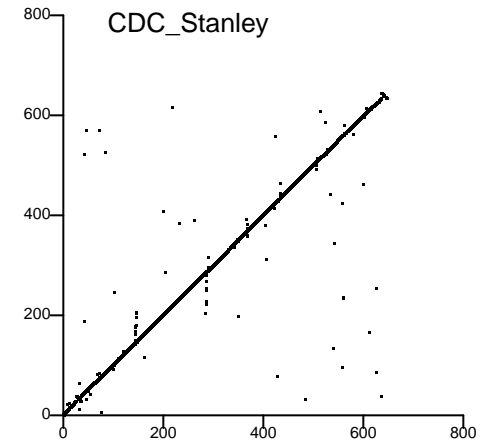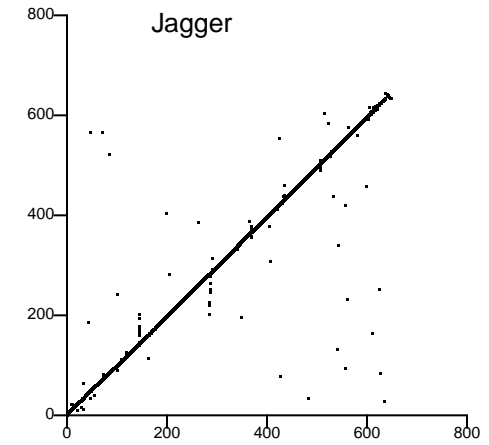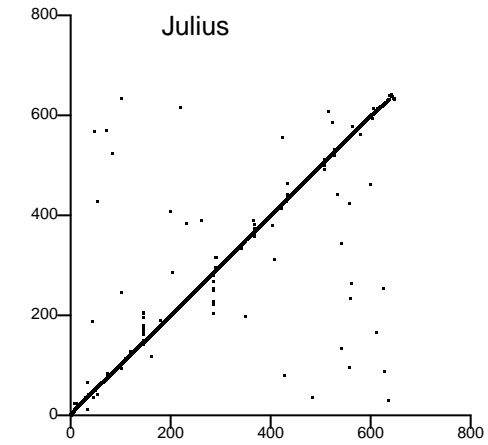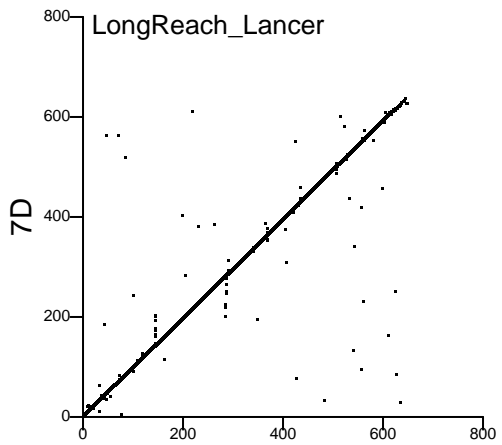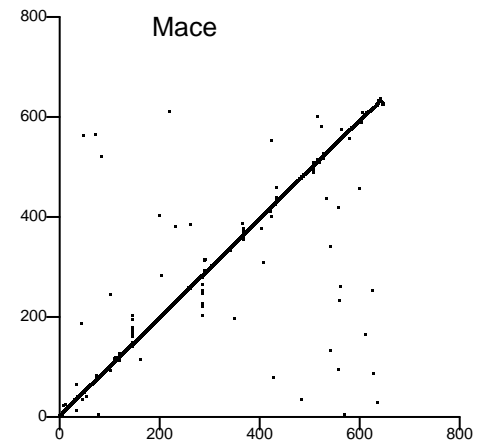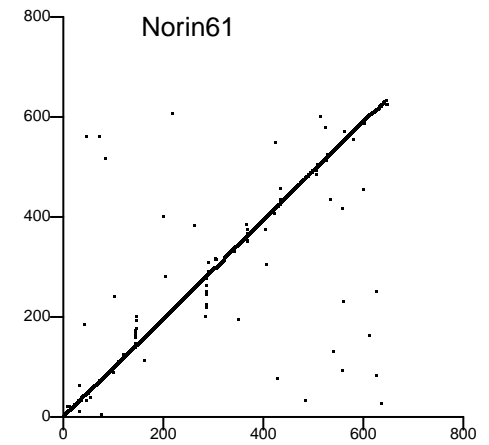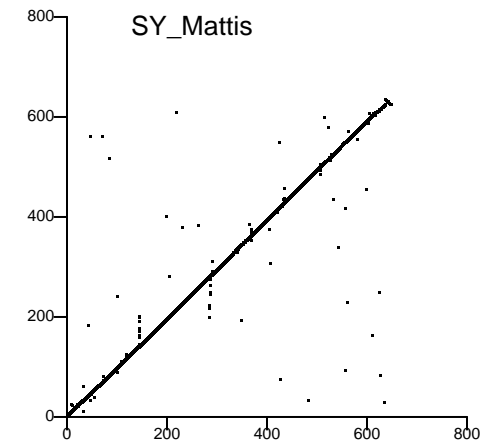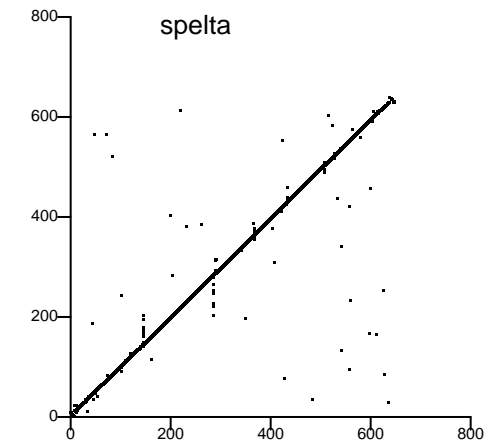

Renan chromosome 7D (Mb)
